1 **Both galactosaminogalactan and  $\alpha$ -1,3-glucan contribute to aggregation of**  
2 ***Aspergillus oryzae* hyphae in liquid culture**

3

4 Ken Miyazawa<sup>a</sup>, Akira Yoshimi<sup>b</sup>, Motoaki Sano<sup>c</sup>, Fuka Tabata<sup>a</sup>, Asumi Sugahara<sup>a</sup>, Shin  
5 Kasahara<sup>d</sup>, Ami Koizumi<sup>a</sup>, Shigekazu Yano<sup>e</sup>, Tasuku Nakajima<sup>b</sup>, and Keietsu Abe<sup>a,b,f,#</sup>

6

7 <sup>a</sup>Laboratory of Applied Microbiology, Department of Microbial Biotechnology,  
8 Graduate School of Agricultural Science, Tohoku University, Sendai, Japan

9 <sup>b</sup>ABE-project, New Industry Creation Hatchery Center, Tohoku University, Sendai,  
10 Japan

11 <sup>c</sup>Genome Biotechnology Laboratory, Kanazawa Institute of Technology, Hakusan, Japan

12 <sup>d</sup>Department of Environmental Sciences, School of Food, Agricultural and  
13 Environmental Sciences, Miyagi University, Taiwa, Japan

14 <sup>e</sup>Department of Biochemical Engineering, Graduate School of Engineering, Yamagata  
15 University, Yonezawa, Japan

16 <sup>f</sup>Laboratory of Microbial Resources, Department of Microbial Biotechnology, Graduate  
17 School of Agricultural Science, Tohoku University, Sendai, Japan

18

19 <sup>#</sup>Correspondence:

20 Keietsu Abe

21 kabe@niche.tohoku.ac.jp

22

23 **Running title**

24 Fully dispersed mutant of *Aspergillus oryzae*

- 1
- 2 Abstract, 226 words
- 3 Text, 5,353 words

1   **Abstract** Filamentous fungi generally form aggregated hyphal pellets in liquid culture.  
2   We previously reported that  $\alpha$ -1,3-glucan-deficient mutants of *Aspergillus nidulans* did  
3   not form hyphal pellets and their hyphae were fully dispersed, and we suggested that  
4    $\alpha$ -1,3-glucan functions in hyphal aggregation. Yet, *Aspergillus oryzae*  
5    $\alpha$ -1,3-glucan-deficient (AG $\Delta$ ) mutants still form small pellets; therefore, we  
6   hypothesized that another factor responsible for forming hyphal pellets remains in these  
7   mutants. Here, we identified an extracellular matrix polysaccharide  
8   galactosaminogalactan (GAG) as such a factor. To produce a double mutant of *A. oryzae*  
9   (AG-GAG $\Delta$ ), we disrupted the genes required for GAG biosynthesis in an AG $\Delta$  mutant.  
10   Hyphae of the double mutant were fully dispersed in liquid culture, suggesting that  
11   GAG is involved in hyphal aggregation in *A. oryzae*. Addition of partially purified GAG  
12   fraction to the hyphae of the AG-GAG $\Delta$  strain resulted in formation of mycelial pellets.  
13   Acetylation of the amino group in galactosamine of GAG weakened GAG aggregation,  
14   suggesting that hydrogen bond formation by this group is important for aggregation.  
15   Genome sequences suggest that  $\alpha$ -1,3-glucan, GAG, or both are present in many  
16   filamentous fungi and thus may function in hyphal aggregation in these fungi. We also  
17   demonstrated that production of a recombinant polyesterase, CutL1, was higher in the  
18   AG-GAG $\Delta$  strain than in the wild-type and AG $\Delta$  strains. Thus, controlling hyphal  
19   aggregation factors of filamentous fungi may increase productivity in the fermentation  
20   industry.

21

22

1 **Importance** Production using filamentous fungi is an important part of the  
2 fermentation industry, but hyphal aggregation in these fungi in liquid culture limits  
3 productivity compared with that of yeast or bacterial cells. We found that  
4 galactosaminogalactan and  $\alpha$ -1,3-glucan both function in hyphal aggregation in  
5 *Aspergillus oryzae*, and that the hyphae of a double mutant deficient in both  
6 polysaccharides become fully dispersed in liquid culture. We also revealed the relative  
7 contribution of  $\alpha$ -1,3-glucan and galactosaminogalactan to hyphal aggregation.  
8 Recombinant protein production was higher in the double mutant than in the wild-type  
9 strain. Our research provides a potential technical innovation for the fermentation  
10 industry that uses filamentous fungi, as regulation of the growth characteristics of *A.*  
11 *oryzae* in liquid culture may increase productivity.

12

13

## 1 Introduction

2 The hyphae of filamentous fungi generally form aggregated pellets in liquid culture.  
3 Although filamentous fungi have been used for industrial production of enzymes and  
4 secondary metabolites for a long time (1, 2), hyphal pellet formation decreases  
5 productivity in liquid culture (3, 4). Formation of hyphal pellets might be related to a  
6 property of the cell surface (5), and elucidation of the relationship between hyphal  
7 aggregation and cell surface components, especially polysaccharides, is needed.

8 The fungal cell wall is essential for survival because it maintains the cell's  
9 shape, prevents cell lysis, and protects cells from environmental stresses (6). Fungal cell  
10 walls are composed mainly of polysaccharides. In *Aspergillus* species, the cell wall is  
11 composed of  $\alpha$ -glucan (mainly  $\alpha$ -1,3-glucan),  $\beta$ -1,3/1,6-glucan, galactomannan, and  
12 chitin (6–8). Cell walls of some filamentous fungi are covered with extracellular matrix,  
13 which is composed mainly of polysaccharides, including  $\alpha$ -glucan ( $\alpha$ -1,3-glucan with a  
14 small amount of  $\alpha$ -1,4-glucan), galactomannan, or galactosaminogalactan (GAG) (9,  
15 10).

16 We reported that the  $\Delta agsB$  and  $\Delta agsA\Delta agsB$  strains of *Aspergillus nidulans*  
17 have no  $\alpha$ -1,3-glucan in the cell wall (11) and their hyphae are fully dispersed in liquid  
18 culture, whereas the wild-type strain forms aggregated pellets. In *Aspergillus fumigatus*,  
19 addition of  $\alpha$ -1,3-glucanase prevents aggregation of germinating conidia (12). These  
20 findings strongly suggest that  $\alpha$ -1,3-glucan is an adhesive factor. We disrupted the three  
21  $\alpha$ -1,3-glucan synthase genes in the industrial fungus *Aspergillus oryzae*  
22 ( $\Delta agsA\Delta agsB\Delta agsC$ ; AG $\Delta$ ) and confirmed the loss of  $\alpha$ -1,3-glucan in the cell wall of  
23 the AG $\Delta$  strain, but the strain still formed small hyphal pellets in liquid culture (13).  
24 Although the AG $\Delta$  hyphae were not fully dispersed, the strain produced more

1 recombinant polyesterase (cutinase) CutL1 than did a wild-type strain (WT-cutL1)  
2 because of the smaller pellets of the AG $\Delta$  strain (13). We predicted that another cell wall  
3 or cell surface component is responsible for hyphal aggregation in the AG $\Delta$  strain.  
4 Identification of this factor, distinct from  $\alpha$ -1,3-glucan, is important, because full  
5 dispersion of *A. oryzae* hyphae would enable higher cell density and increase production  
6 of commercially valuable products in liquid culture.

7 GAG is a hetero-polysaccharide composed of linear  $\alpha$ -1,4-linked galactose  
8 (Gal), *N*-acetylgalactosamine (GalNAc), and galactosamine (GalN). GAG is an  
9 important pathogenetic factor in the human pathogen *A. fumigatus* (14, 15); it is  
10 involved in adherence to host cells, biofilm formation, and avoidance of immune  
11 response by masking  $\beta$ -1,3-glucan and chitin (9, 16). Disruption of genes encoding the  
12 transcription factors StuA and MedA significantly decreases GAG content and has led  
13 to identification of the *uge3* (UDP-glucose 4-epimerase) gene (16). Four genes (*sph3*,  
14 *gtb3*, *ega3*, and *agd3*) located near *uge3* have been identified (17). In *stuA* and *medA*  
15 gene disruptants, these five genes are downregulated, suggesting that they are  
16 co-regulated by StuA and MedA (17). GAG biosynthesis by the five encoded proteins is  
17 predicted in *A. fumigatus* (9, 18). First, the epimerase Uge3 produces  
18 UDP-galactopyranose (Galp) from UDP-glucose and UDP-*N*-GalNAc from  
19 UDP-*N*-acetylglucosamine (GlcNAc) (16, 19). Second, glycosyltransferase Gtb3  
20 polymerizes UDP-Galp and UDP-GalNAc and exports the polymer from the cytoplasm.  
21 Third, deacetylase Agd3 deacetylates the synthesized GAG polymer (17). The predicted  
22 glycoside hydrolase Ega3 has yet to be characterized. Sph3 belongs to a novel glycoside  
23 hydrolase family, GH135, and is essential for GAG production (18), but its role in GAG  
24 synthesis remains unknown.

1           Here, we confirmed that *A. oryzae* has the GAG biosynthetic gene cluster. We  
2 disrupted *sphZ* (ortholog of *A. fumigatus sph3*) and *ugeZ* (ortholog of *uge3*) in the  
3 wild-type and AG $\Delta$  strains to produce  $\Delta sphZ\Delta ugeZ$  (GAG $\Delta$ ) and  
4  $\Delta agsA\Delta agsB\Delta agsC\Delta sphZ\Delta ugeZ$  (AG-GAG $\Delta$ ), respectively. In liquid culture, the  
5 hyphae of the AG-GAG $\Delta$  strain were fully dispersed, suggesting that GAG plays a role  
6 in hyphal adhesion in *A. oryzae*, along with  $\alpha$ -1,3-glucan. Using the wild-type, AG $\Delta$ ,  
7 GAG $\Delta$ , and AG-GAG $\Delta$  strains of *A. oryzae*, we characterized hyphal aggregation and  
8 discuss its mechanism in *A. oryzae*. Our findings may have wide implications because  
9 the genomes of many filamentous fungi encode enzymes required for  $\alpha$ -1,3-glucan or  
10 GAG biosynthesis, or both (7, 17).

11

## 1 MATERIALS AND METHODS

2 **Strains and growth media.** Strains used are listed in Table 1. *Aspergillus oryzae* NS4  
3 (*sC*, *niaD*<sup>-</sup>) with  $\Delta ligD$  ( $\Delta ligD::sC$ ,  $\Delta adeA::ptrA$ ) was used for all genetic manipulations  
4 (20). All *A. oryzae* strains were cultured in standard Czapek–Dox (CD) medium as  
5 described previously (11, 13). The *niaD*<sup>-</sup> strains were cultured in CDE medium (CD  
6 medium containing 70 mM sodium hydrogen L(+)-glutamate monohydrate as the  
7 nitrogen source instead of sodium nitrate).

8 Conidia of *A. oryzae* used to inoculate flask cultures were isolated from  
9 cultures grown on malt medium, as described previously (13). YPD medium containing  
10 2% peptone (Becton Dickinson and Company, Sparks, Nevada, USA), 1% yeast extract  
11 (Becton Dickinson and Company), and 2% glucose was used for flask culture to analyze  
12 growth characteristics. YPM medium containing 2% peptone, 1% yeast extract, and 2%  
13 maltose was used for flask culture to evaluate production of recombinant cutL1.

14  
15 **Construction of dual *sphZ ugeZ* gene disruptant in *A. oryzae*.** Fragments containing  
16 the 3' non-coding regions of *ugeZ* (amplicon 1) and *sphZ* (amplicon 2) derived from *A.*  
17 *oryzae* genomic DNA, and the *adeA* gene (amplicon 3) from the TOPO-2.1-*adeA*  
18 plasmid (13), were amplified by PCR. Amplicon 1 was amplified with the primers  
19 *sphZ+ugeZ-LU* and *sphZ+ugeZ-LL+ade*, amplicon 2 with the primers  
20 *sphZ+ugeZ-RU+ade* and *sphZ+ugeZ-RL*, and amplicon 3 with the primers  
21 *sphZ+ugeZ-AU* and *sphZ+ugeZ-AL*. The primers *sphZ+ugeZ-LL+ade*, *sphZ+ugeZ-AU*,  
22 and *sphZ+ugeZ-AL* were chimeric; each contained a reverse-complement sequence for  
23 PCR fusion. The PCR products were gel-purified and used as substrates for the second  
24 round of PCR with the primers *sphZ+ugeZ-LU* and *sphZ+ugeZ-RL* to fuse the three



1 fragments (Fig. S1A). The resulting major PCR product was gel-purified and used to  
2 transform *A. oryzae* wild-type and AG $\Delta$  strains (Fig. S1B). Disruption of the *sphZ* and  
3 *ugeZ* genes was confirmed by Southern blot analysis (Fig. S1C).

4

5 **Analysis of the growth characteristics of *A. oryzae* in liquid culture.** Conidia (final  
6 concentration,  $1 \times 10^5$ /mL) of the wild-type, AG $\Delta$ , GAG $\Delta$ , and AG-GAG $\Delta$  strains were  
7 inoculated into 50 mL of YPD medium in 200-mL Erlenmeyer flasks and rotated at 120  
8 rpm at 30°C for 24 h. The mean diameter of the hyphal pellets was determined as  
9 described previously (13).

10

11 **Scanning electron microscopy.** Conidia (final concentration,  $1 \times 10^5$ /mL) of the  
12 wild-type, AG $\Delta$ , GAG $\Delta$ , and AG-GAG $\Delta$  *A. oryzae* strains were inoculated and grown as  
13 above. The culture broths were filtered through Miracloth (Merck Millipore, Darmstadt,  
14 Germany). The mycelia were washed with water twice, dehydrated with tert-butanol,  
15 lyophilized, and coated with platinum–vanadium. Mycelia were observed under a  
16 Hitachi SU8000 scanning electron microscope (Hitachi, Tokyo, Japan) at an  
17 accelerating voltage of 3 kV.

18

19 **Assay of cell wall susceptibility to Lysing Enzymes.** Susceptibility of the fungal cell  
20 wall to Lysing Enzymes (LE), a commercial preparation containing  $\beta$ -1,3-glucanase and  
21 chitinase (Sigma, St. Louis, MO, USA), was assayed as described previously (11).  
22 Washed 1-day-old mycelia of the wild-type, AG $\Delta$ , GAG $\Delta$ , and AG-GAG $\Delta$  strains (30  
23 mg fresh weight) grown in CDE medium at 30°C were suspended in 1 mL of 0.8 M  
24 NaCl in sodium phosphate buffer (10 mM, pH 6.0) containing 10 mg/mL LE and

1 incubated for 1, 2, or 4 h at 30°C. The number of protoplasts generated from the  
2 mycelia was counted with a hemocytometer (A106, SLGC, Tokyo, Japan).

3

4 **Assay for growth inhibition by Congo Red.** Sensitivity of the wild-type, AG $\Delta$ , GAG $\Delta$ ,  
5 and AG-GAG $\Delta$  strains to Congo Red was evaluated using our previously described  
6 method (11), with a minor modification. Briefly, conidial suspensions of each strain (1.0  
7  $\times 10^4$  cells) were spotted on the centers of CDE plates containing Congo Red (10, 20,  
8 40, 80, or 120  $\mu\text{g}/\text{mL}$ ) and incubated at 30°C for 3 days. The dose response was  
9 determined by plotting the mean diameters of the colonies on media with Congo Red as  
10 a percentage of those on control medium. Each experiment was performed in  
11 quadruplicate.

12

13 **Fractionation of cell wall components and quantification of carbohydrate**  
14 **composition.** Conidia (final concentration,  $1.0 \times 10^5/\text{mL}$ ) of the wild-type, AG $\Delta$ ,  
15 GAG $\Delta$ , and AG-GAG $\Delta$  strains were inoculated into 200 mL of YPD medium in 500  
16 mL-Erlenmeyer flasks and rotated at 120 rpm at 30°C. Mycelia were collected by  
17 filtration through Miracloth, washed twice with 20 mL of water, and lyophilized.  
18 Mycelia were pulverized with a MM400 bench-top mixer mill (Retsch, Haan, Germany),  
19 and the resulting powder (1 g) was suspended in 40 mL of 0.1 M sodium phosphate  
20 buffer (pH 7.0). Cell wall components were fractionated by hot-water and alkali  
21 treatment (13), and the fractionation resulted in hot-water-soluble (HW), alkali-soluble  
22 (AS), and alkali-insoluble (AI) fractions. The AS fraction was further separated into a  
23 fraction soluble in water at neutral pH (AS1) and an insoluble fraction (AS2). The  
24 carbohydrate composition of the fractions was quantified as described previously (11).

1 Briefly, 10 mg of each cell wall fraction was hydrolyzed with sulfuric acid and then  
2 neutralized with barium sulfate. The carbohydrate composition of the hydrolysate was  
3 determined using high-performance anion-exchange chromatography (HPAEC). For  
4 GalN quantification, the carbohydrate composition of sulfuric acid–hydrolyzed HW  
5 fractions (50 mg each) was quantified.

6

7 **Purification of GAG from culture supernatant of the AG $\Delta$  strain by fractional**

8 **precipitation with ethanol.** Conidia (final concentration,  $1.0 \times 10^6$ /mL) of the AG $\Delta$  or

9 AG-GAG $\Delta$  strain (negative control) were inoculated into 3 flasks, each containing 1 L

10 of modified Brian medium (14), and rotated at 160 rpm at 30°C for 72 h. The mycelia

11 were removed by filtration through Miracloth. The supernatants were combined and

12 concentrated to 1 L by evaporation, dialyzed against water at 4°C, and concentrated

13 again to 1 L; then 20 g of NaOH was added (final concentration, 0.5 M) at 4°C with

14 stirring. The mixture was centrifuged at 3000  $\times g$  at 4°C for 10 min and a pellet was

15 obtained (referred to hereafter as the 0 vol). EtOH fraction. EtOH (0.5 L) was added to

16 the supernatant and the mixture was incubated for 5 h at 4°C with stirring, then

17 centrifuged at 3000  $\times g$  at 4°C for 10 min, and a pellet (0.5 vol. EtOH fraction) was

18 obtained. These procedures were repeated to obtain 1, 1.5, 2, and 2.5 vol. EtOH

19 fractions. Each fraction was neutralized with 3 M HCl, dialyzed against water, and

20 freeze-dried. The carbohydrate composition of each fraction was determined as above.

21 For mycelial aggregation assay, each freeze-dried EtOH fraction from the AG $\Delta$  strain (2

22 mg) and the 1.5 vol. EtOH fraction from the AG-GAG $\Delta$  strain was dissolved in 1 mL of

23 0.1 M HCl and vortexed for 10 min.

24

1     **Conidial and mycelial aggregation assay.** A modified method of Fontaine et al. (12)  
2     was used. Conidia ( $5 \times 10^5$ ) were inoculated into 500  $\mu$ L of CDE liquid medium  
3     containing 0.05% Tween 20 in a 48-well plate and agitated at 1200 rpm with a  
4     microplate mixer (NS-P; As One, Osaka, Japan) at 30°C for 3, 6, or 9 h. Conidial  
5     aggregates were then examined under a stereomicroscope (M125; Leica Microsystems,  
6     Wetzlar, Germany). Mycelial aggregation in the presence of GAG was evaluated as  
7     follows. Conidia (final concentration,  $1.0 \times 10^7$ /mL) of the AG-GAG $\Delta$  strain were  
8     inoculated into 50 mL of YPD medium and rotated at 120 rpm at 30°C for 9 h. The  
9     mycelia were collected by filtration through Miracloth and washed twice with water.  
10    The mycelia (wet weight, 500 mg) were resuspended in 10 mL of PBS, and the  
11    suspension (25  $\mu$ L) was added into a mixture of 400  $\mu$ L of water, 50  $\mu$ L of 1 M sodium  
12    phosphate buffer (pH 7.0), and 25  $\mu$ L of the EtOH fraction (from AG $\Delta$ ) or the mock  
13    fraction (from AG-GAG $\Delta$ ). Aggregates were examined under a stereomicroscope after 1  
14    h.

15           To evaluate the effect of pH on mycelial aggregation by GAG, the mycelial  
16    suspension (25  $\mu$ L) was added into a mixture of 450  $\mu$ L of buffer (final concentration,  
17    100 mM) and 25  $\mu$ L of the 1.5 vol. EtOH fraction. The following buffers were used: pH  
18    4.0–5.0, sodium acetate; pH 6.0–7.0, sodium phosphate; pH 8.0, Tricine-NaOH.  
19    Aggregates were examined at 1 h.

20           To examine the effect of inhibiting hydrogen bond formation, the mycelial  
21    suspension (25  $\mu$ L) was added into a mixture of 450  $\mu$ L of 100 mM sodium phosphate  
22    buffer (pH 7.0) and 0, 1, 2, 4, or 8 M urea, and 25  $\mu$ L of the 1.5 vol. EtOH fraction.

23

24    **Acetylation of the amino group of galactosaminogalactan.** The 1.5 vol. EtOH

1 fraction from the AGΔ (5 mg) was dissolved in ice cold 0.5 M NaOH (800 μL),  
2 neutralized with ice cold 2 M HCl, and then added to 4 mL of 50 mM sodium acetate.  
3 Then, methanol (4 mL) and acetic anhydride (10 mg) were added and the mixture was  
4 stirred at room temperature for 24 h. The sample was then evaporated, washed three  
5 times with methanol, dialyzed against water, and freeze-dried. The procedure was then  
6 repeated.

7

8 **Visualization of  $\alpha$ -1,3-glucan, GAG, and hydrophobin in the cell wall.** Germinating  
9 conidia cultured in a 48-well plate were dropped onto a glass slide, washed twice with  
10 PBS, and fixed with 4% (w/v) paraformaldehyde for 10 min. Samples were washed  
11 twice with 50 mM potassium phosphate buffer (pH 6.5) and stained at room temperature  
12 for 2 h with Alexa Fluor 647–conjugated soybean agglutinin (SBA; 100 μg/mL)  
13 (Invitrogen) and  $\alpha$ -1,3-glucanase- $\alpha$ -1,3-glucan–binding domain fused with GFP  
14 (AGBD-GFP; 100 μg/mL) (21) in 50 mM phosphate buffer (pH 6.5). After being  
15 washed with the same buffer, the samples were imaged under a FluoView FV1000  
16 confocal laser-scanning microscope (Olympus, Tokyo, Japan). For hydrophobin staining,  
17 fixed cells were washed twice with PBS and incubated at 30°C for 2 h with a rabbit  
18 polyclonal antibody against RolA (T.K. Craft, Gunma, Japan) diluted 1:200 in PBS.  
19 Cells were then washed three times with PBS, and a drop of PBS containing secondary  
20 antibody (anti-rabbit IgG antibody–Alexa Fluor 568 conjugate; Invitrogen) was added.  
21 The sample was incubated at room temperature for 1 h, washed as above, and imaged  
22 under the confocal laser-scanning microscope.

23

24 **Quantification of CutL1 production.** A *cutL1*-overexpressing strain

1 (AG-GAG $\Delta$ -cutL1) was constructed as described previously (13) with the  
2 pNGA-gla-Cut plasmid (22). Integration of a single copy of the *cutL1*-overexpression  
3 construct at the *niaD* locus was confirmed by Southern blot analysis (Fig. S2). Enzyme  
4 production in the mutants was evaluated as described previously (13), with some  
5 modifications. Briefly, conidia (final concentration,  $1 \times 10^4$ /mL) of the WT-cutL1,  
6 AG $\Delta$ -cutL1, and AG-GAG $\Delta$ -cutL1 strains were inoculated into 50 mL of YPM medium  
7 and rotated at 100 rpm at 30°C for 24 h. The culture broth was filtered through  
8 Miracloth. Mycelial cells were dried at 70°C for 24 h and weighed. Proteins were  
9 precipitated from an aliquot of the filtrate (400  $\mu$ L) with 100% (w/v) trichloroacetic acid  
10 (200  $\mu$ L), separated by SDS-PAGE, and stained with Coomassie Brilliant Blue. ImageJ  
11 software was used to quantify the amount of CutL1 in the broth; purified CutL1 was  
12 used for calibration.

13

14 **<sup>13</sup>C NMR analysis of cell wall fractions.** <sup>13</sup>C NMR analysis was performed as  
15 described previously (23). The AS2 fractions from the wild-type and GAG $\Delta$  strains  
16 were dissolved in 1 M NaOH/D<sub>2</sub>O. Me<sub>2</sub>SO-d<sub>6</sub> (deuterated dimethyl sulfoxide; 5  $\mu$ L)  
17 was added to each sample. <sup>13</sup>C NMR spectra were obtained using a JNM-ECX400P  
18 spectrometer (JEOL, Tokyo, Japan) at 400 MHz, 35°C (72,000 scans).

19

20 **RNA purification, reverse transcription, and quantitative PCR.** Total RNA was  
21 extracted using Sepasol-RNA I Super according to the manufacturer's instructions  
22 (Nakarai Tesque, Kyoto, Japan). Total RNA (2  $\mu$ g) was reverse transcribed and cDNA  
23 was amplified using a High-Capacity cDNA Reverse Transcription Kit according to the  
24 manufacturer's instructions (Thermo Fisher Scientific, Waltham, MA, USA).

1 Quantitative PCR was performed with the AoagsB-RT-F and AoagsB-RT-R primers  
2 using KOD SYBR qPCR Mix (Toyobo Co., Ltd., Osaka, Japan).

3

4 **Statistical analysis.** Tukey's test was used for the comparison of multiple samples.

5

## 6 **Results**

7 ***Aspergillus oryzae* has a GAG biosynthetic gene cluster.** In *A. fumigatus*, GAG  
8 biosynthesis is regulated by a cluster of five genes, and this cluster is conserved in a  
9 wide range of filamentous fungi (17). To check whether *A. oryzae* possesses the GAG  
10 gene cluster, we used a BLAST search (<https://blast.ncbi.nlm.nih.gov/Blast.cgi>). We  
11 found that all five GAG biosynthetic genes, orthologous to *A. fumigatus* *uge3*, *sph3*,  
12 *ega3*, *agd3*, and *gtb3* (Fig. 1A), are conserved in *A. oryzae*: *ugeZ*, *sphZ*, *egaZ*, *agdZ*,  
13 and *gtbZ* (Fig. 1B). *Aspergillus oryzae* UgeZ had motifs conserved among group 2  
14 epimerases (19), SphZ contained a spherulin 4 conserved region (18), and AgdZ had the  
15 conserved motifs of the carbohydrate esterase family 4 (17). These findings indicated  
16 that *A. oryzae*, similar to *A. fumigatus*, can produce GAG.

17

18 **Hyphae of the AG-GAG $\Delta$  strain are completely dispersed in liquid culture.** Because  
19 disruption of the *sph3* and *uge3* genes leads to a loss of GAG in *A. fumigatus* (18, 19),  
20 we disrupted *sphZ* and *ugeZ* in *A. oryzae* in the genetic background of the wild-type and  
21 AG $\Delta$  strains, and we obtained the GAG $\Delta$  and AG-GAG $\Delta$  strains, respectively. The  
22 wild-type, AG $\Delta$ , AG-GAG $\Delta$ , and GAG $\Delta$  strains showed almost the same mycelial  
23 growth and conidiation on CD agar plates after 5 days at 30°C (Fig. S3). When grown in  
24 YPD liquid medium at 30°C for 24 h, the wild-type strain formed significantly larger

1 hyphal pellets ( $3.7 \pm 0.2$  mm in diameter) than did the AG $\Delta$  strain ( $2.7 \pm 0.3$  mm; Fig.  
2 2A, B), in good agreement with our previous results (13). The hyphae of the AG-GAG $\Delta$   
3 strain were completely dispersed, and the GAG $\Delta$  strain formed significantly larger  
4 hyphal pellets ( $6.2 \pm 0.0$  mm) than did the wild-type strain (Fig. 2A, B). These results  
5 strongly suggest that, in addition to  $\alpha$ -1,3-glucan, GAG has a role in hyphal adhesion in  
6 *A. oryzae* and that the defect in both AG and GAG biosynthetic genes is required for full  
7 dispersion of *A. oryzae* hyphae.

8 Scanning electron microscopy revealed that the surface of *A. fumigatus* hyphae  
9 has GAG-dependent decorations in liquid culture, which are lost in the *sph3*, *uge3*, and  
10 *agd3* gene disruptants (17–19). We investigated whether the hyphae of *A. oryzae* GAG $\Delta$   
11 and AG-GAG $\Delta$  strains lack such decorations. As expected, we observed fibrous  
12 decorations on the hyphal cells of the wild-type and AG $\Delta$  *A. oryzae* strains (Fig. 2C),  
13 but the hyphae of the GAG $\Delta$  and AG-GAG $\Delta$  strains had smooth surfaces (Fig. 2C).  
14 These results suggest that the fibrous decorations on the cell surface are attributable to  
15 the presence of the GAG biosynthetic gene cluster in *A. oryzae*.

16 We used three approaches to analyze why the GAG $\Delta$  strain formed larger  
17 hyphal pellets in liquid culture: (1) HPAEC-pulsed amperometric detection analysis of  
18 cell wall components in alkali-soluble fractions showed no significant difference in the  
19 amount of glucose in the AS2 fractions between the wild-type and GAG $\Delta$  strains (Fig.  
20 S4A); (2) Expression of the *agsB* gene, which encodes the main  $\alpha$ -1,3-glucan synthase  
21 of *A. oryzae* (24), was slightly lower in the GAG $\Delta$  strain than in the wild-type strain at 6  
22 h of culture, but it was slightly higher at 24 h (Fig. S4B); and (3)  $^{13}\text{C}$  NMR analysis of  
23 the AS2 fraction showed that the main component was  $\alpha$ -1,3-glucan in both strains (Fig.  
24 S4C). The reason why the GAG $\Delta$  strain formed larger aggregated pellets remains



1 unclear from the results of our experiments.

2

3 **Disruptants of AG and GAG biosynthetic genes are sensitive to Lysing Enzymes**

4 **and Congo Red.** To investigate the consequences of cell wall alteration caused by the

5 loss of GAG, we assessed the susceptibility of the wild-type, AG $\Delta$ , AG-GAG $\Delta$ , and

6 GAG $\Delta$  strains to LE and CR. The concentrations of protoplasts formed from hyphae

7 tended to be higher for the AG $\Delta$  strain than for the wild-type strain after 2 and 4 h of

8 treatment with LE ( $0.05 < p < 0.1$ ; Fig. 3A). In contrast, protoplast concentration was

9 significantly higher for the AG-GAG $\Delta$  strain than for the wild-type and AG $\Delta$  strains at

10 each time point (Fig. 3A). Protoplast concentration was also significantly higher for the

11 GAG $\Delta$  strain than for the wild-type and AG $\Delta$  strains after 1 and 4 h (Fig. 3A), but it

12 was significantly lower than for the AG-GAG $\Delta$  strain after 4 h (Fig. 3A). All three

13 mutant strains were significantly more sensitive to CR than the wild type: the

14 AG-GAG $\Delta$  strain was most sensitive, and the AG $\Delta$  and GAG $\Delta$  strains showed similar

15 sensitivity (Fig. 3B). These data revealed that AG and GAG additively contribute to cell

16 wall protection from cell wall-degrading enzymes and environmental chemicals.

17

18 **Disruption of the *sphZ* and *ugeZ* genes decreases the amount of**

19 **galactosaminogalactan in the cell wall.** Gravelat et al. (16) quantified the GAG

20 content as the amount of GalN after complete hydrolysis of ethanol-precipitated

21 supernatant from *A. fumigatus* culture. To apply this approach to *A. oryzae*, we analyzed

22 the hydrolyzed HW fractions of each strain by HPAEC. The HW fractions from both the

23 wild-type and AG $\Delta$  strains contained 0.2–0.3 mg/g biomass GalN (Fig. 4), whereas

24 GalN was hardly detectable in the HW fractions from the GAG $\Delta$  and AG-GAG $\Delta$  strains

1 (Fig. 4). These results show that *ugeZ* and/or *sphZ* are essential for GAG production in  
2 *A. oryzae*.

3

4 **Temporally and spatially different contributions of  $\alpha$ -1,3-glucan and GAG to**

5 **hyphal aggregation in liquid culture.** The complete dispersion of the AG-GAG $\Delta$

6 hyphae demonstrated that both  $\alpha$ -1,3-glucan and GAG function as adhesive factors for

7 hyphal aggregation in *A. oryzae*, and consequently the hyphae expressing both

8 polysaccharides form pellets (Fig. 2). To analyze the temporal and spatial contribution

9 of the two polysaccharides, wild type, AG $\Delta$ , GAG $\Delta$ , and AG-GAG $\Delta$  conidia were

10 cultured in 48-well plates, and formation of hyphal pellets was examined (Fig. 5). The

11 presence of  $\alpha$ -1,3-glucan and GAG on the surfaces of conidia and germinating hyphae

12 in liquid culture was analyzed by fluorescence microscopy with AGBD-GFP, which

13 binds specifically to  $\alpha$ -1,3-glucan, and lectin SBA, which binds specifically to GalNAc

14 (Fig. 6). At the initiation of culture (0 h), conidia of all strains formed scarce aggregates

15 (Fig. 5). Fluorescence of AGBD-GFP was observed on wild-type and GAG $\Delta$  conidia,

16 but not on AG $\Delta$  or AG-GAG $\Delta$  conidia (Fig. 6A). SBA fluorescence was undetectable on

17 conidia of any strains (Fig. 6A). At 3 h after inoculation, hyphae of germinated conidia

18 of the wild-type and GAG $\Delta$  strains aggregated and formed small pellets, but aggregates

19 of AG $\Delta$  and AG-GAG $\Delta$  germinated candida were scarce (Fig. 5). At 3 h, AGBD-GFP

20 fluorescence was detectable on wild-type and GAG $\Delta$  germinated conidia, but none of

21 the strains was stained with SBA (Fig. 6B). At 6 h, the wild type, AG $\Delta$ , and GAG $\Delta$

22 formed hyphal pellets, but aggregates of AG-GAG $\Delta$  were scarce (Fig. 5). AGBD-GFP

23 fluorescence was observed on hyphae of the wild type and GAG $\Delta$ , and that of SBA was

24 observed in the wild-type and AG $\Delta$  strains (Fig. 6C). At 9 h, the wild-type, GAG $\Delta$ , and

1 AG $\Delta$  strains formed hyphal pellets (Fig. 5) similar to those formed after 24 h of culture  
2 in YPD medium. The fluorescence profiles of AGBD-GFP and SBA for each strain were  
3 similar to those observed at 6 h (Fig. 6D). The AG-GAG $\Delta$  strain hardly formed any  
4 hyphal pellets at any time point (Figs. 5 and 6). Neither conidia nor hyphae of  
5 AG-GAG $\Delta$  were stained by AGBD-GFP or SBA (Fig. 6). GFP fluorescence in the  
6 wild-type and GAG $\Delta$  strains seemed to be weaker at 0 and 3 h than at 6 and 9 h; this  
7 might have been caused by the presence of a hydrophobin layer covering the  
8  $\alpha$ -1,3-glucan layer (Fig. S5) (25, 26). These results indicate that hyphal aggregation  
9 caused by  $\alpha$ -1,3-glucan was initiated just after inoculation, whereas GAG-dependent  
10 hyphal aggregation started 3–6 h after inoculation.

11

12 **GAG-dependent aggregation of hyphae *in vitro* and its pH dependence.** According  
13 to the previously described GAG purification method (14), we obtained the ethanol  
14 precipitates from the AG $\Delta$  strain and washed them with 150 mM sodium chloride.  
15 However, the precipitates were fully solubilized in 150 mM sodium chloride. Therefore,  
16 we developed an EtOH fractional precipitation method to isolate GAG from culture  
17 supernatants, and we obtained six fractions. The 0, 0.5, 1, 2, and 2.5 vol. fractions from  
18 the AG $\Delta$  strain contained approximately 8% of Gal and 5% of mannose, with a small  
19 amount of GalN (Fig. 7A). The 1.5 vol. fraction from the AG $\Delta$  strain contained 16% of  
20 GalN, 17% of Gal, and 4% of mannose (Fig. 7A); thus, this fraction but not the other  
21 fractions appeared to contain mainly GAG and galactomannan. The 1.5 vol. fraction  
22 from the AG-GAG $\Delta$  strain contained no GalN but contained 8% of Gal and 5% of  
23 mannose (Fig. 7A). As calculated from the composition of the 1.5 vol. fraction from the  
24 AG-GAG $\Delta$  strain, the 1.5 vol. fraction from AG $\Delta$  appeared to contain approximately

1 70% of GAG. To evaluate whether the aggregation of hyphae could be reproduced *in*  
2 *vitro*, the fractions were added to the mycelia of the AG-GAG $\Delta$  strain and mycelial  
3 aggregation was examined. Only the 1.5 vol. fraction from the AG $\Delta$  strain induced  
4 aggregation (Fig. 7B). The aggregates were stained with an SBA–Alexa Fluor 647  
5 conjugate (Fig. 7C). The 1.5 vol. fraction from AG $\Delta$  did not form aggregates without  
6 mycelia (Fig. 7D).

7 In *A. fumigatus*, GalNAc moieties in GAG are partly deacetylated and  
8 consequently positively charged (14), and we wondered whether GAG-dependent  
9 aggregation depends on pH. Addition of GAG to mycelia of the AG-GAG $\Delta$  strain led to  
10 aggregation at pH 6, 7; aggregates were scarce at pH 4, 5, and 8 (Fig. 8A). The conidia  
11 remained dispersed upon the addition of the mock fraction at any pH (Fig. 8B). These  
12 results suggest that the increased positive charge in GAG at acidic pH leads to electric  
13 repulsion among GAG chains and consequently prevents GAG-dependent mycelial  
14 aggregation. Around the neutral pH, the positive charge might be lower and  
15 consequently GAG might contribute to hyphal adhesion via non-electrostatic  
16 interactions. The reason for the absence of aggregate formation at pH 8 is unknown.

17

18 **GAG-dependent aggregation is caused by hydrogen bonding between**  
19 **polysaccharides.** We hypothesized that GAG-dependent aggregation was caused by  
20 hydrogen bonding via the amino groups of GalN. To test this hypothesis, we treated  
21 GalN with or without acetic anhydride and then evaluated the aggregation. In the  
22 presence of non-acetylated GAG, the AG-GAG $\Delta$  mycelia aggregated, similar to the  
23 results in Figure 7A, whereas GAG acetylation weakened mycelial aggregation (Fig.  
24 9A). These results suggest that the amino groups of GalN are involved in

1 GAG-dependent aggregation.

2 To confirm that GAG-dependent aggregation relies on hydrogen bonds, we  
3 performed mycelial aggregation assay in the presence of urea, which breaks hydrogen  
4 bonds. Mycelia aggregated without urea, but aggregation was weakened by increasing  
5 urea concentrations (Fig. 9B). Taken together, these results strongly suggest that  
6 hydrogen bond formation via the amino groups of GalN is important for  
7 GAG-dependent aggregation.

8

9 **Production of a recombinant enzyme is increased in the AG-GAG $\Delta$  strain.** We  
10 investigated whether hyphal dispersion would increase biomass and enzyme production  
11 in *A. oryzae*. As expected, hyphae of the AG-GAG $\Delta$  strain cultured in YPM medium  
12 were fully dispersed and those of the AG $\Delta$  strain formed smaller pellets than those of  
13 the wild-type strain (Fig. 10A). After 24 h of culture, both biomass and cutinase  
14 production were higher in the AG-GAG $\Delta$  strain (approximately 10 times) and in the  
15 AG $\Delta$  strain (4 times) than in the wild type (Fig. 10B, C). This result suggests that  
16 hyphal dispersion caused by a loss of the hyphal aggregation factors  $\alpha$ -1,3-glucan and  
17 GAG can increase biomass and recombinant enzyme production in filamentous fungi  
18 that have  $\alpha$ -1,3-glucan or GAG or both.

## 1 Discussion

2 Hyphae of filamentous fungi generally form large aggregated pellets in liquid culture,  
3 thus limiting the fermentative production of commercially valuable enzymes and  
4 metabolites (3, 27). Aggregation of hyphae seems to be related to their cell surface  
5 properties (7, 12, 28), but the mechanism of hyphal aggregation is not well understood.  
6 We previously demonstrated that  $\alpha$ -1,3-glucan in the cell wall has a role in hyphal  
7 adhesion in *A. nidulans* (11, 23), and that the hyphae of  $\alpha$ -1,3-glucan-deficient mutants  
8 of *A. oryzae* form smaller pellets than those of the wild type but are not dispersed (13).  
9 We concluded that  $\alpha$ -1,3-glucan is an adhesive factor for *A. oryzae* hyphae, but another  
10 factor involved in hyphal adhesion remains in the AG $\Delta$  strain. Here, we focused on  
11 GAG, a component of the extracellular matrix, as a candidate adhesive factor. Lee et al.  
12 (17) revealed that GAG biosynthesis is controlled by five clustered genes (*gtb3*, *agd3*,  
13 *ega3*, *sph3*, and *uge3*) in *A. fumigatus*, and that similar gene clusters are conserved in  
14 various fungi, such as *A. niger* and *A. nidulans*. We found that the gene cluster is also  
15 conserved in the genome of *A. oryzae*.

16  $\alpha$ -1,3-Glucan contributes to hyphal and mycelial adhesion in *A. nidulans*, *A.*  
17 *oryzae*, and *A. fumigatus* (11–13). GAG mediates hyphal adhesion to plastic, fibronectin,  
18 and epithelial cells, and its function is related to pathogenesis in *A. fumigatus* (16).  
19 GAG also mediates biofilm formation in plate cultures (16). However, neither the  
20 relationship between GAG and hyphal aggregation nor the phenotype of an AG-GAG  
21 double mutant (AG-GAG $\Delta$ ) has been reported. Here, we constructed AG-GAG $\Delta$  and a  
22 single mutant (GAG $\Delta$ ) in *A. oryzae* and analyzed their growth in liquid culture. The  
23 AG-GAG $\Delta$  hyphae were completely dispersed, but the GAG $\Delta$  hyphae formed pellets  
24 larger than those of the wild-type strain (Fig. 2). These results suggest that not only

1  $\alpha$ -1,3-glucan but also GAG contributes to hyphal aggregation in *A. oryzae*.

2 We investigated whether  $\alpha$ -1,3-glucan and GAG showed temporal and spatial  
3 differences in their effects on hyphal aggregation during germination and hyphal growth.  
4 Because the germ tubes of the wild-type and GAG $\Delta$  strains aggregated at 3 h after  
5 inoculation of their conidia, whereas those of AG $\Delta$  did so at 6 h, we conclude that  
6  $\alpha$ -1,3-glucan is present on the surface of most hyphae just after germination and acts as  
7 an adhesive factor, whereas GAG, which is secreted and presented around the hyphal  
8 tips, contributed to hyphal aggregation at 6 h after inoculation (Figs. 5 and 6). We  
9 succeeded in *in vitro* aggregation of AG-GAG $\Delta$  hyphae by adding GAG partially  
10 purified from AG $\Delta$  strains (Fig. 7). In the presence of GAG, AG-GAG $\Delta$  mycelia  
11 aggregated at pH 6 and 7, but aggregation was reduced at acidic pH (Fig. 8B).

12 In the GAG biosynthetic gene cluster, *agd3* encodes *N*-acetylgalactosamine  
13 deacetylase, and GalNAc molecules in GAG chains from *A. fumigatus* are partly  
14 deacetylated (14). Disruption of *agd3* in *A. fumigatus* abolishes GAG deacetylation and  
15 results in a loss of cell wall-associated GAG (17). Positively charged amino groups in  
16 deacetylated GalNAc in GAG are thought to be required for the attachment of hyphae to  
17 negatively charged surfaces (17) and likely prevent hyphal aggregation at acidic pH  
18 because of electric repulsion; these groups would be unprotonated at pH close to neutral,  
19 in particular at the putative isoelectric point of GAG. Therefore, attachment of GAG in  
20 this pH range might be attributable to hydrogen bonding between the amino groups of  
21 GalN and the OH groups of sugar moieties in glucan of the hyphal cell wall or GAG  
22 chains pre-attached to the cell wall. Addition of GAG with amino groups acetylated by  
23 acetic anhydride hardly induced mycelial aggregation (Fig. 9A). GAG-induced mycelial  
24 aggregation was also inhibited in the presence of 8 M urea (Fig. 9B). These

1 observations indicate that amino group acetylation abolishes hydrogen bonding between  
2 GAG and hyphal glucans or GAG pre-attached to hyphae. Hydrogen bonds might be a  
3 major force in GAG-dependent hyphal aggregation at pH close to neutral. When hyphae  
4 aggregated by addition of GAG at neutral pH were subsequently transferred to acidic  
5 buffer (pH 4), they remained aggregated (data not shown), suggesting that, once formed,  
6 the adhesion among GAG chains is resistant to acidic conditions.

7         Formation of hyphal pellets limits productivity in the fermentation industry that  
8 uses filamentous fungi, including *Aspergillus* species, because the inner part of the  
9 pellet is inactive (3). In *A. niger*, titanate particles are used as a scaffold for hyphal  
10 pellets to minimize their size (27). Although physical approaches are efficient, they limit  
11 the range of culture media. The AG-GAG $\Delta$  strain produced significantly larger amounts  
12 of biomass and cutinase than did the AG $\Delta$  and wild-type strains; it did not require any  
13 scaffold particles, suggesting that controlling the hyphal aggregation factors of hyphae  
14 is an innovative approach for the fermentation industry.

15         We demonstrated that both  $\alpha$ -1,3-glucan and GAG on the hyphal surface  
16 contribute to the formation of hyphal pellets and are adhesive molecules. The  
17 physicochemical properties of the two polysaccharides differ.  $\alpha$ -1,3-Glucan is a  
18 water-insoluble major cell wall polysaccharide, whereas GAG is secreted and is a  
19 water-soluble component of the extracellular matrix. Further studies are necessary to  
20 understand the molecular mechanism underlying the interactions among  $\alpha$ -1,3-glucan  
21 and GAG chains.



## 1 **Author Contributions**

2 KM, AY, and KA conceived and designed the experiments. AY determined the  
3 sensitivity to LE and CR. KM and MS constructed fungal mutants. FT performed the  
4 assay of CutL1 production. KM and AS performed the Southern blot analysis. SK  
5 performed the <sup>13</sup>C NMR analysis. AK and SY produced AGBD-GFP. KM and TN  
6 performed fractional precipitation of GAG. KM performed most experiments and  
7 analyzed the data.

8

## 9 **Funding**

10 This work was supported by a Grant-in-Aid for Scientific Research (B) [26292037] and  
11 (C) [18K05384] from the Japan Society for the Promotion of Science (JSPS) and a  
12 Grant-in-Aid for JSPS Fellows [18J11870]. This work was also supported by the  
13 Institute for Fermentation, Osaka, Japan (Grant No. L-2018-2-014).

14

## 15 **Acknowledgments**

16 We are grateful to Associate Professor Toshikazu Komoda (Miyagi University) for  
17 operating the NMR spectrometer. We are also grateful to Dr. Makoto Ogata (National  
18 Institute of Technology, Fukushima College) for advising the acetylation method of  
19 polysaccharides. The manuscript was edited by ELSS, Inc. (<http://www.elss.co.jp/en/>).

20

## 21 **References**

- 22 1. Abe K, Gomi K, Hasegawa F, Machida M. 2006. Impact of *Aspergillus oryzae*  
23 genomics on industrial production of metabolites. *Mycopathologia* 162:143–153.
- 24 2. Kobayashi T, Abe K, Asai K, Gomi K, Juvvadi PR, Kato M, Kitamoto K,

- 1           Takeuchi M, Machida M. 2007. Genomics of *Aspergillus oryzae*. Biosci  
2           Biotechnol Biochem 71:646–670.
- 3    3.     Driouch H, Sommer B, Wittmann C. 2010. Morphology engineering of  
4           *Aspergillus niger* for improved enzyme production. Biotechnol Bioeng  
5           105:1058–1068.
- 6    4.     Karahalil E, Demirel F, Evcan E, Germec M. 2017. Microparticle-enhanced  
7           polygalacturonase production by wild type *Aspergillus sojae*. Biotechniques  
8           7:361.
- 9    5.     Beauvais A, Fontaine T, Aimanianda V, Latgé JP. 2014. *Aspergillus* cell wall and  
10          biofilm. Mycopathologia 178:371–377.
- 11   6.     Yoshimi A, Miyazawa K, Abe K. 2016. Cell wall structure and biogenesis in  
12          *Aspergillus* species. Biosci Biotechnol Biochem 80:1700–1711.
- 13   7.     Yoshimi A, Miyazawa K, Abe K. 2017. Function and biosynthesis of cell wall  
14           $\alpha$ -1,3-glucan in fungi. J Fungi 3:63.
- 15   8.     Latgé J-P. 2010. Tasting the fungal cell wall. Cell Microbiol 12:863–872.
- 16   9.     Sheppard DC, Howell PL. 2016. Biofilm exopolysaccharides of pathogenic  
17          fungi: Lessons from bacteria. J Biol Chem 291:12529–12537.
- 18   10.    Lee MJ, Sheppard DC. 2016. Recent advances in the understanding of the  
19          *Aspergillus fumigatus* cell wall. J Microbiol 54:232–242.
- 20   11.    Yoshimi A, Sano M, Inaba A, Kokubun Y, Fujioka T, Mizutani O, Hagiwara D,  
21          Fujikawa T, Nishimura M, Yano S, Kasahara S, Shimizu K, Yamaguchi M,  
22          Kawakami K, Abe K. 2013. Functional analysis of the  $\alpha$ -1,3-glucan synthase  
23          genes *agsA* and *agsB* in *Aspergillus nidulans*: *AgsB* is the major  $\alpha$ -1,3-glucan  
24          synthase in this fungus. PLoS One 8:e54893.

- 1 12. Fontaine T, Beauvais A, Loussert C, Thevenard B, Fulgsang CC, Ohno N,  
2 Clavaud C, Prevost MC, Latgé JP. 2010. Cell wall  $\alpha$ 1-3glucans induce the  
3 aggregation of germinating conidia of *Aspergillus fumigatus*. Fungal Genet Biol  
4 47:707–712.
- 5 13. Miyazawa K, Yoshimi A, Zhang S, Sano M, Nakayama M, Gomi K, Abe K.  
6 2016. Increased enzyme production under liquid culture conditions in the  
7 industrial fungus *Aspergillus oryzae* by disruption of the genes encoding cell wall  
8  $\alpha$ -1,3-glucan synthase. Biosci Biotechnol Biochem 80:1853–1863.
- 9 14. Fontaine T, Delangle A, Simenel C, Coddeville B, van Vliet SJ, van Kooyk Y,  
10 Bozza S, Moretti S, Schwarz F, Trichot C, Aebi M, Delepierre M, Elbim C,  
11 Romani L, Latgé JP. 2011. Galactosaminogalactan, a new immunosuppressive  
12 polysaccharide of *Aspergillus fumigatus*. PLoS Pathog 7:e1002372.
- 13 15. Lee MJ, Liu H, Barker BM, Snarr BD, Gravelat FN, Al Abdallah Q, Gavino C,  
14 Baistrocchi SR, Ostapska H, Xiao T, Ralph B, Solis N V., Lehoux M, Baptista  
15 SD, Thammahong A, Cerone RP, Kaminskyj SGW, Guiot MC, Latgé JP,  
16 Fontaine T, Vinh DC, Filler SG, Sheppard DC. 2015. The fungal  
17 exopolysaccharide galactosaminogalactan mediates virulence by enhancing  
18 resistance to neutrophil extracellular traps. PLoS Pathog 11:e1005187.
- 19 16. Gravelat FN, Beauvais A, Liu H, Lee MJ, Snarr BD, Chen D, Xu W, Kravtsov I,  
20 Hoareau CMQ, Vanier G, Urb M, Campoli P, Al Abdallah Q, Lehoux M, Chabot  
21 JC, Ouimet MC, Baptista SD, Fritz JH, Nierman WC, Latgé JP, Mitchell AP,  
22 Filler SG, Fontaine T, Sheppard DC. 2013. *Aspergillus* galactosaminogalactan  
23 mediates adherence to host constituents and conceals hyphal  $\beta$ -glucan from the  
24 immune system. PLoS Pathog 9:e1003575.

- 1 17. Lee MJ, Geller AM, Bamford NC, Liu H, Gravelat FN, Snarr BD, Le Mauff F,  
2 Chabot J, Ralph B, Ostapska H, Lehoux M, Cerone RP, Baptista SD, Vinogradov  
3 E, Stajich JE, Filler SG, Howell PL, Sheppard DC. 2016. Deacetylation of fungal  
4 exopolysaccharide mediates adhesion and biofilm formation. *MBio* 7:1–14.
- 5 18. Bamford NC, Snarr BD, Gravelat FN, Little DJ, Lee MJ, Zacharias CA, Chabot  
6 JC, Geller AM, Baptista SD, Baker P, Robinson H, Howell PL, Sheppard DC.  
7 2015. Sph3 is a glycoside hydrolase required for the biosynthesis of  
8 galactosaminogalactan in *Aspergillus fumigatus*. *J Biol Chem* 290:27438–27450.
- 9 19. Lee MJ, Gravelat FN, Cerone RP, Baptista SD, Campoli P V., Choe SI, Kravtsov  
10 I, Vinogradov E, Creuzenet C, Liu H, Berghuis AM, Latgé JP, Filler SG,  
11 Fontaine T, Sheppard DC. 2014. Overlapping and distinct roles of *Aspergillus*  
12 *fumigatus* UDP-glucose 4-epimerases in galactose metabolism and the synthesis  
13 of galactose-containing cell wall polysaccharides. *J Biol Chem* 289:1243–1256.
- 14 20. Mizutani O, Kudo Y, Saito A, Matsuura T, Inoue H, Abe K, Gomi K. 2008. A  
15 defect of LigD (human Lig4 homolog) for nonhomologous end joining  
16 significantly improves efficiency of gene-targeting in *Aspergillus oryzae*. *Fungal*  
17 *Genet Biol* 45:878–889.
- 18 21. Suyotha W, Yano S, Takagi K, Rattanakit-Chandet N, Tachiki T, Wakayama M.  
19 2013. Domain structure and function of  $\alpha$ -1,3-glucanase from *Bacillus circulans*  
20 KA-304, an enzyme essential for degrading basidiomycete cell walls. *Biosci*  
21 *Biotechnol Biochem* 77:639–647.
- 22 22. Maeda H, Yamagata Y, Abe K, Hasegawa F, Machida M, Ishioka R, Gomi K,  
23 Nakajima T. 2005. Purification and characterization of a biodegradable  
24 plastic-degrading enzyme from *Aspergillus oryzae*. *Appl Microbiol Biotechnol*

- 1           67:778–788.
- 2   23.   Miyazawa K, Yoshimi A, Kasahara S, Sugahara A, Koizumi A, Yano4 S,  
3           Kimura S, Iwata T, Sano M, Abe K. 2018. Molecular mass and localization of  
4            $\alpha$ -1,3-glucan in cell wall control the degree of hyphal aggregation in liquid  
5           culture of *Aspergillus nidulans*. *Front Microbiol* 9:2623.
- 6   24.   Zhang S, Sato H, Ichinose S, Tanaka M, Miyazawa K, Yoshimi A, Abe K,  
7           Shintani T, Gomi K. 2017. Cell wall  $\alpha$ -1,3-glucan prevents  $\alpha$ -amylase adsorption  
8           onto fungal cell in submerged culture of *Aspergillus oryzae*. *J Biosci Bioeng*  
9           124:47–53.
- 10   25.   Takahashi T, Maeda H, Yoneda S, Ohtaki S, Yamagata Y, Hasegawa F, Gomi K,  
11           Nakajima T, Abe K. 2005. The fungal hydrophobin RolA recruits polyesterase  
12           and laterally moves on hydrophobic surfaces. *Mol Microbiol* 57:1780–1796.
- 13   26.   Takahashi T, Tanaka T, Tsushima Y, Muragaki K, Uehara K, Takeuchi S, Maeda  
14           H, Yamagata Y, Nakayama M, Yoshimi A, Abe K. 2015. Ionic interaction of  
15           positive amino acid residues of fungal hydrophobin RolA with acidic amino acid  
16           residues of cutinase CutL1. *Mol Microbiol* 96:14–27.
- 17   27.   Driouch H, Hänsch R, Wucherpfennig T, Krull R, Wittmann C. 2012. Improved  
18           enzyme production by bio-pellets of *Aspergillus niger*: Targeted morphology  
19           engineering using titanate microparticles. *Biotechnol Bioeng* 109:462–471.
- 20   28.   Priegnitz BE, Wargenau A, Brandt U, Rohde M, Dietrich S, Kwade A, Krull R,  
21           Fleißner A. 2012. The role of initial spore adhesion in pellet and biofilm  
22           formation in *Aspergillus niger*. *Fungal Genet Biol* 49:30–38.
- 23

1 **Supplemental Figure Legends**

2 **Figure S1. Construction of *sphZ* and *ugeZ* gene disruption strains.** (A) Scheme of  
3 construction of the *sphZ* and *ugeZ* gene disruption cassette. (B) Strategy for replacement  
4 of the disrupted *sphZ* and *ugeZ* genes with the adenine requirement marker *adeA*. Thin  
5 arrows indicate *PstI* digestion sites near the *sphZ* and *ugeZ* locus. (C) Southern blot  
6 analysis of the *sphZ* and *ugeZ* locus in the wild-type (lane 1), GAG $\Delta$  (lane 2), AG $\Delta$   
7 (lane 3), and AG-GAG $\Delta$  (lane 4) strains using the probe indicated in (B).

8

9 **Figure S2. Southern blot analysis of the AG-GAG $\Delta$ -cutL1 strains.** Chromosomal  
10 DNA of the control strain (lane C) and the cutL1-overexpressing strains (lanes 1–3) was  
11 digested with *XhoI* and hybridized with the probe indicated in the upper panel.

12

13 **Figure S3. Mycelial growth of the wild-type, AG $\Delta$ , AG-GAG $\Delta$ , and GAG $\Delta$  strains**  
14 **on CDE agar plates.** Conidia ( $1 \times 10^4$ ) of each strain were inoculated at the center of a  
15 CDE agar plate and incubated at 30°C for 4 days.

16

17 **Figure S4. Characterization of  $\alpha$ -1,3-glucan in the cell wall of the wild-type, AG $\Delta$ ,**  
18 **AG-GAG $\Delta$ , and GAG $\Delta$  strains.** (A) Composition of the AS2 and AI fractions. (B)  
19 Expression of the *agsB* gene. (C)  $^{13}\text{C}$  NMR spectra of the AS2 fractions from the  
20 wild-type and GAG $\Delta$  strains.

21

22 **Figure S5. Visualization of hydrophobin in the cell wall.** Conidia ( $5.0 \times 10^5$ ) of the  
23 wild-type (WT) strain were dropped on a glass slide, fixed with 4% (w/v)  
24 paraformaldehyde, stained with fluorophore-labeled antibody against RolA, and

1 observed under a confocal laser-scanning microscope ( $\times 1000$ ). Scale bars, 20  $\mu\text{m}$ .

2

1 **Table 1. Strains used in this study**

| <b>Strain</b>                                                                       | <b>Genotype</b>                                                                                                        | <b>Reference</b> |
|-------------------------------------------------------------------------------------|------------------------------------------------------------------------------------------------------------------------|------------------|
| NS4 ( $\Delta ligD::sC, \Delta adeA::ptrA$ )<br>(wild type)                         | $\Delta ligD::sC, \Delta adeA::ptrA, niaD^-, adeA^+$                                                                   | (20)             |
| $\Delta agsA \Delta agsB \Delta agsC$<br>(AG $\Delta$ )                             | $\Delta ligD::sC, \Delta adeA::ptrA, niaD^-, adeA^+, agsA::loxP, agsB::loxP, agsC::loxP$                               | (13)             |
| $\Delta sphZ \Delta ugeZ$ (GAG $\Delta$ )                                           | $\Delta ligD::sC, \Delta adeA::ptrA, niaD^-, sphZ ugeZ::adeA$                                                          | This study       |
| $\Delta agsA \Delta agsB \Delta agsC \Delta sphZ \Delta ugeZ$<br>(AG-GAG $\Delta$ ) | $\Delta ligD::sC, \Delta adeA::ptrA, niaD^-, agsA::loxP, agsB::loxP, agsC::loxP, sphZ ugeZ::adeA$                      | This study       |
| WT-cutL1                                                                            | $\Delta ligD::sC, \Delta adeA::ptrA, niaD^-, adeA^+, PglA142-cutL1::niaD$                                              | (13)             |
| AG $\Delta$ -cutL1                                                                  | $\Delta ligD::sC, \Delta adeA::ptrA, niaD^-, adeA^+, agsA::loxP, agsB::loxP, agsC::loxP, PglA142-cutL1::niaD$          | (13)             |
| AG-GAG $\Delta$ -cutL1                                                              | $\Delta ligD::sC, \Delta adeA::ptrA, niaD^-, agsA::loxP, agsB::loxP, agsC::loxP, sphZ ugeZ::adeA, PglA142-cutL1::niaD$ | This study       |

2



1 **Table 2. PCR primers used in this study**

| <b>Purpose</b>               | <b>Primer name</b> | <b>Sequence (5' to 3')</b>                  |
|------------------------------|--------------------|---------------------------------------------|
| <i>sphZ, ugeZ</i> disruption |                    |                                             |
|                              | sphZ+ugeZ-LU       | TCTCCATAGTGTTACCA                           |
|                              | sphZ+ugeZ-LL+Ade   | ATATACCGTGACTTTTTAGCACAAACATTGGAGCTACT      |
|                              | sphZ+ugeZ-RU+Ade   | AGTTTCGTCGAGATACTGCGCGTTGTCATATTTGCAAG      |
|                              | sphZ+ugeZ-RL       | AGGGCTCAGAATACGTATC                         |
|                              | sphZ+ugeZ-AU       | AGTAGCTCCAATGTTGTGCTAAAAAGTCACGGTATATCATGAC |
|                              | sphZ+ugeZ-AL       | TTGCAAATATGACAACGCGCAGTATCTCGACGAAACTACCTAA |
| Quantitative PCR             |                    |                                             |
|                              | agsB-RT-F          | GAACTTTGTCGCGGTCATCCTTCAG                   |
|                              | agsB-RT-R          | CCAAGGGAGGTAGTAGCCAATG                      |

2

**A**

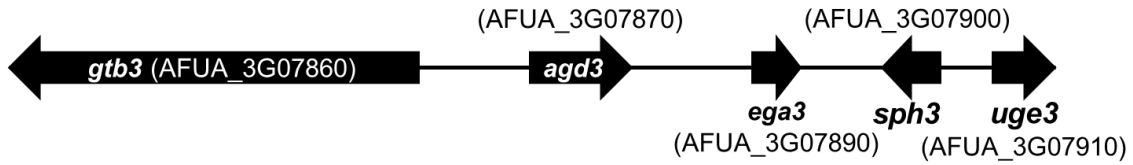

**B**

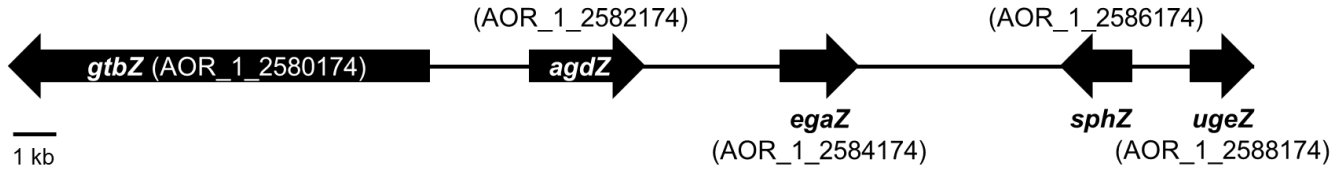

Nucleotide sequence identity (%) 68.5  
 Amino acid sequence identity (%) 72.3

68.3  
 69.2

68.3  
 68.6

61.4  
 76.6

77.0  
 86.4

**FIG 1.** GAG biosynthetic cluster in (A) *Aspergillus fumigatus* and (B) *Aspergillus oryzae*. The cluster of *A. oryzae* was predicted from the sequence of the cluster of *A. fumigatus* by using a BLAST search.

A

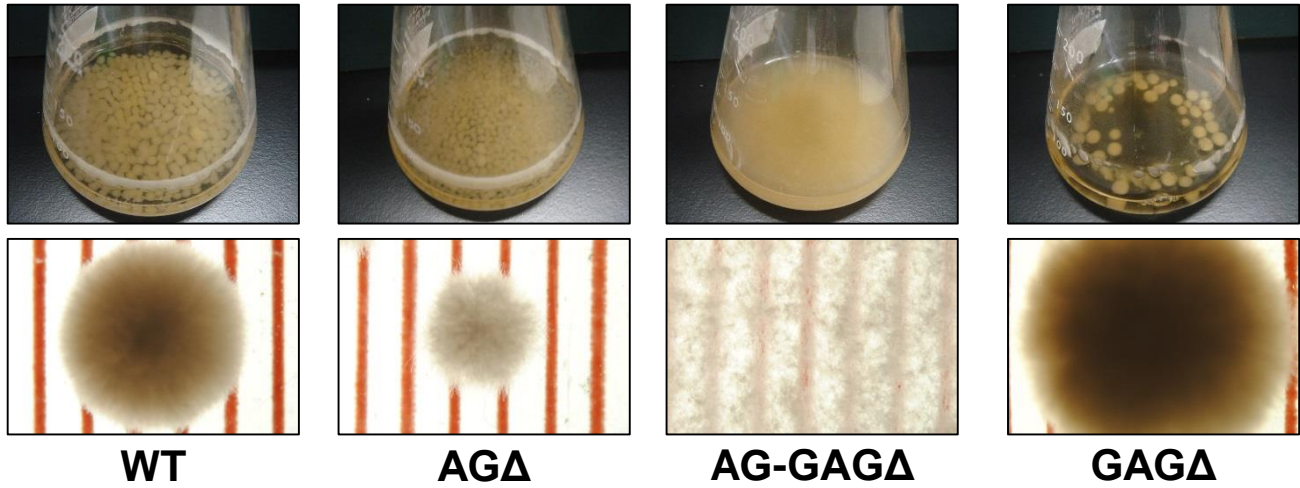

WT

AG $\Delta$ AG-GAG $\Delta$ GAG $\Delta$ 

B

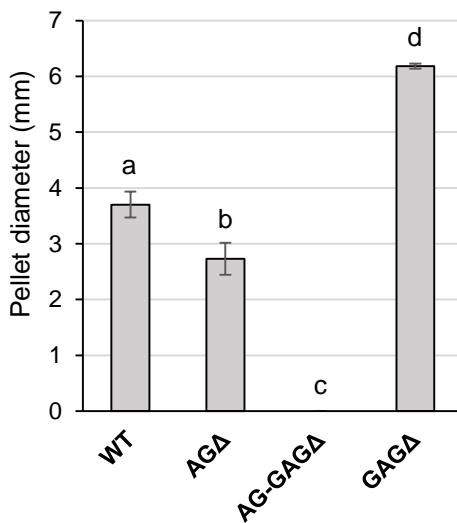

C

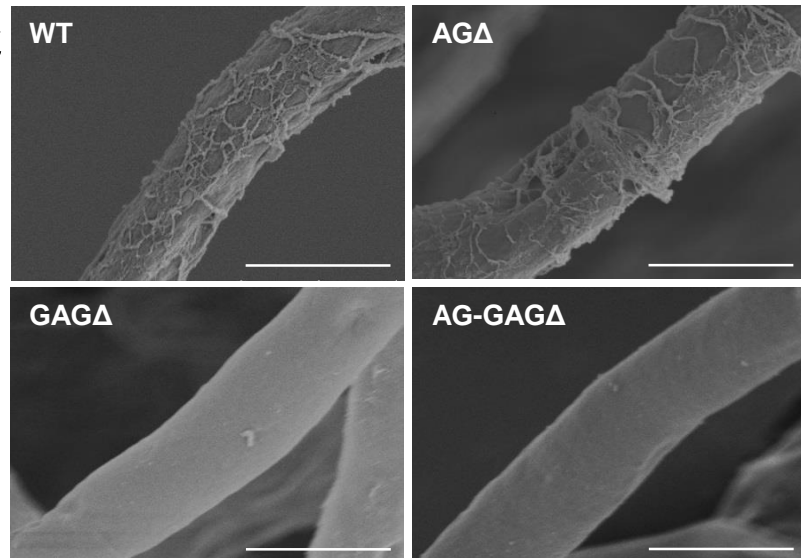

**FIG 2.** Phenotypes of *Aspergillus oryzae*  $\Delta$ *agsA* $\Delta$ *agsB* $\Delta$ *agsC* $\Delta$ *sphZ* $\Delta$ *ugeZ* (AG-GAG $\Delta$ ) and  $\Delta$ *sphZ* $\Delta$ *ugeZ* (GAG $\Delta$ ) strains in liquid culture. (A) The wild-type (WT),  $\Delta$ *agsA* $\Delta$ *agsB* $\Delta$ *agsC* (AG $\Delta$ ), AG-GAG $\Delta$ , and GAG $\Delta$  strains were cultured in Erlenmeyer flasks (upper row), and images of hyphal pellets were taken under a stereomicroscope (bottom row; scale, 1 mm) at 24 h of culture. (B) The mean diameter of hyphal pellets was determined by measuring 10 randomly selected pellets per replicate under a stereomicroscope. Error bars represent standard deviations calculated from three replicates. (C) Morphology of each strain was examined under a scanning electron microscope. Scale bars, 5  $\mu$ m.

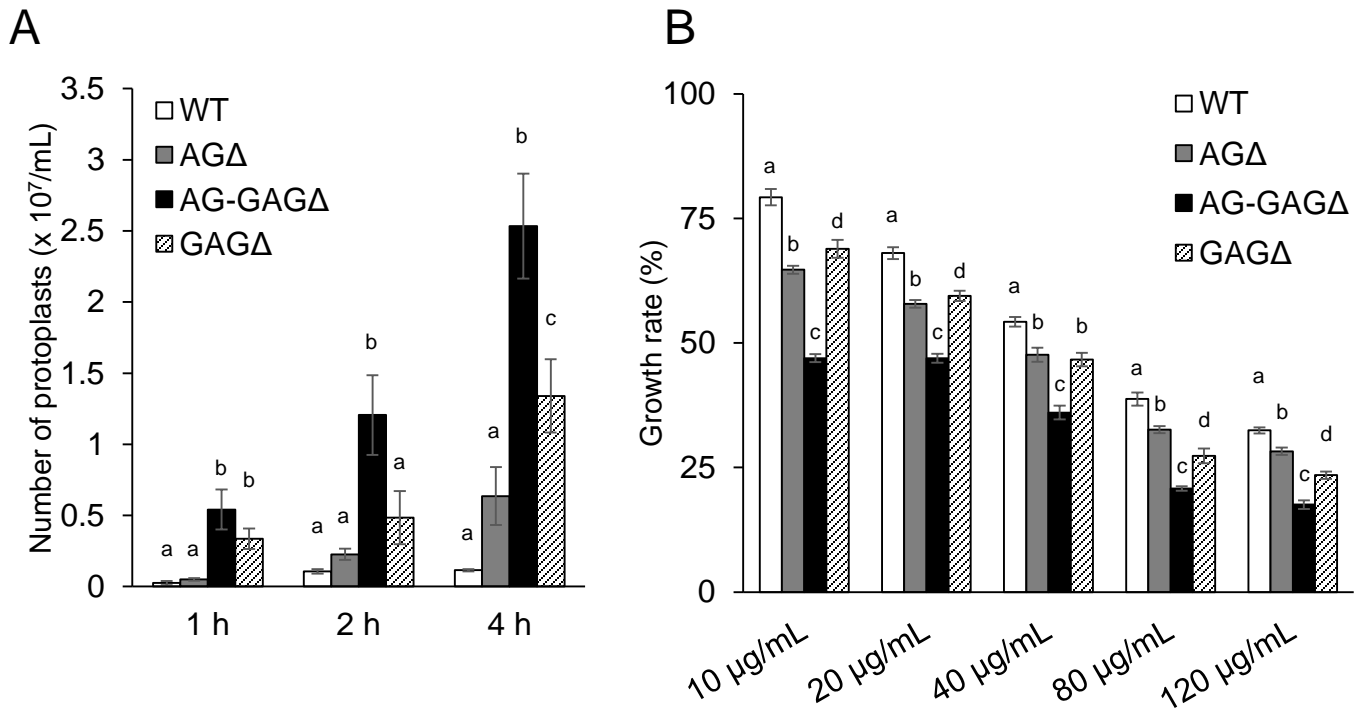

**FIG 3.** Sensitivity to Congo Red and Lysing Enzymes. (A) Mycelia cultured for 1 day were suspended in sodium phosphate buffer (10 mM, pH 6.0) containing 0.8 M NaCl and 10 mg/mL Lysing Enzymes. After 1, 2, and 4 h, protoplasts were counted under a microscope. Error bars represent the standard deviation calculated from three replicates. (B) Growth rates after 3 days on CDE medium at the indicated concentrations of Congo Red. Diameter of the colonies grown on CDE medium without Congo Red was considered as 100%. Error bars represent standard deviations calculated from three replicates. In both panels, different letters indicate significant differences within each condition by Tukey's test ( $p < 0.05$ ).

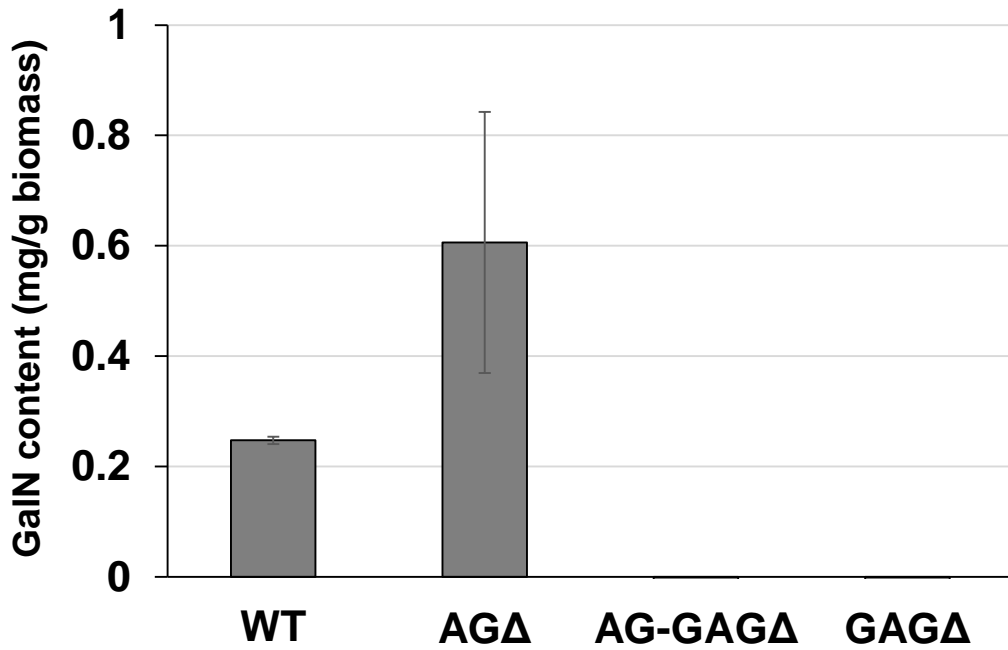

**FIG 4.** Galactosamine (GalN) content in the hot water-soluble fraction of the cell wall from the wild-type (WT),  $\Delta agsA\Delta agsB\Delta agsC$  (AG $\Delta$ ),  $\Delta agsA\Delta agsB\Delta agsC\Delta sphZ\Delta ugeZ$  (AG-GAG $\Delta$ ), and  $\Delta sphZ\Delta ugeZ$  (GAG $\Delta$ ) strains. Error bars represent standard error of the mean calculated from three replicates.

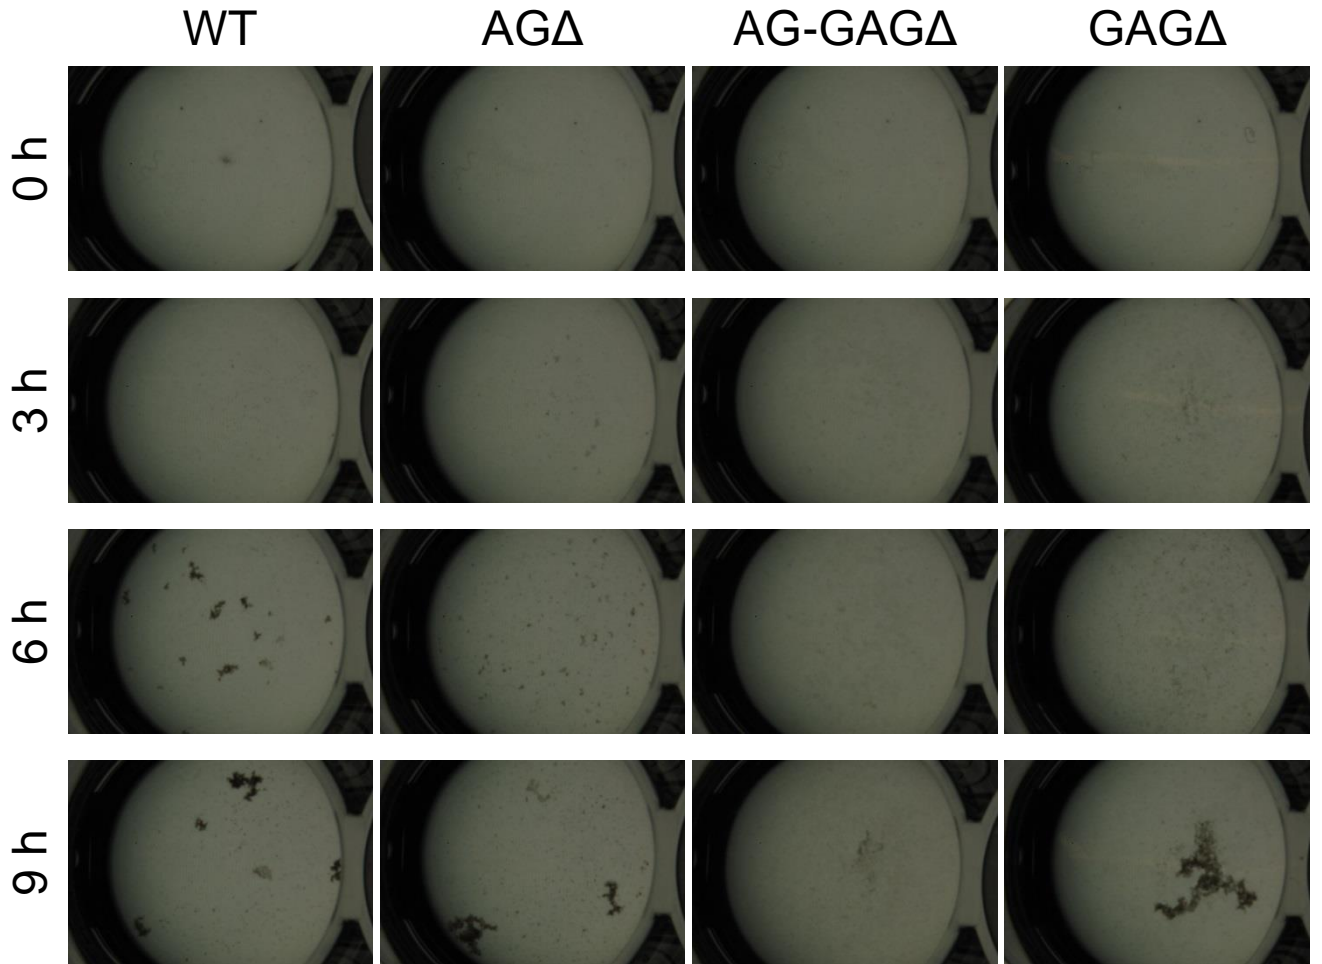

**FIG 5.** Conidial aggregation assay. Conidia ( $5 \times 10^5$ ) of the wild-type (WT),  $\Delta agsA\Delta agsB\Delta agsC$  (AG $\Delta$ ),  $\Delta agsA\Delta agsB\Delta agsC\Delta sphZ\Delta ugeZ$  (AG-GAG $\Delta$ ), and  $\Delta sphZ\Delta ugeZ$  (GAG $\Delta$ ) strains were inoculated into 500  $\mu$ L of CDE liquid medium and incubated at 30°C with shaking (1200 rpm). Photographs were taken at the indicated time points under a stereomicroscope (magnification,  $\times 8$ ).

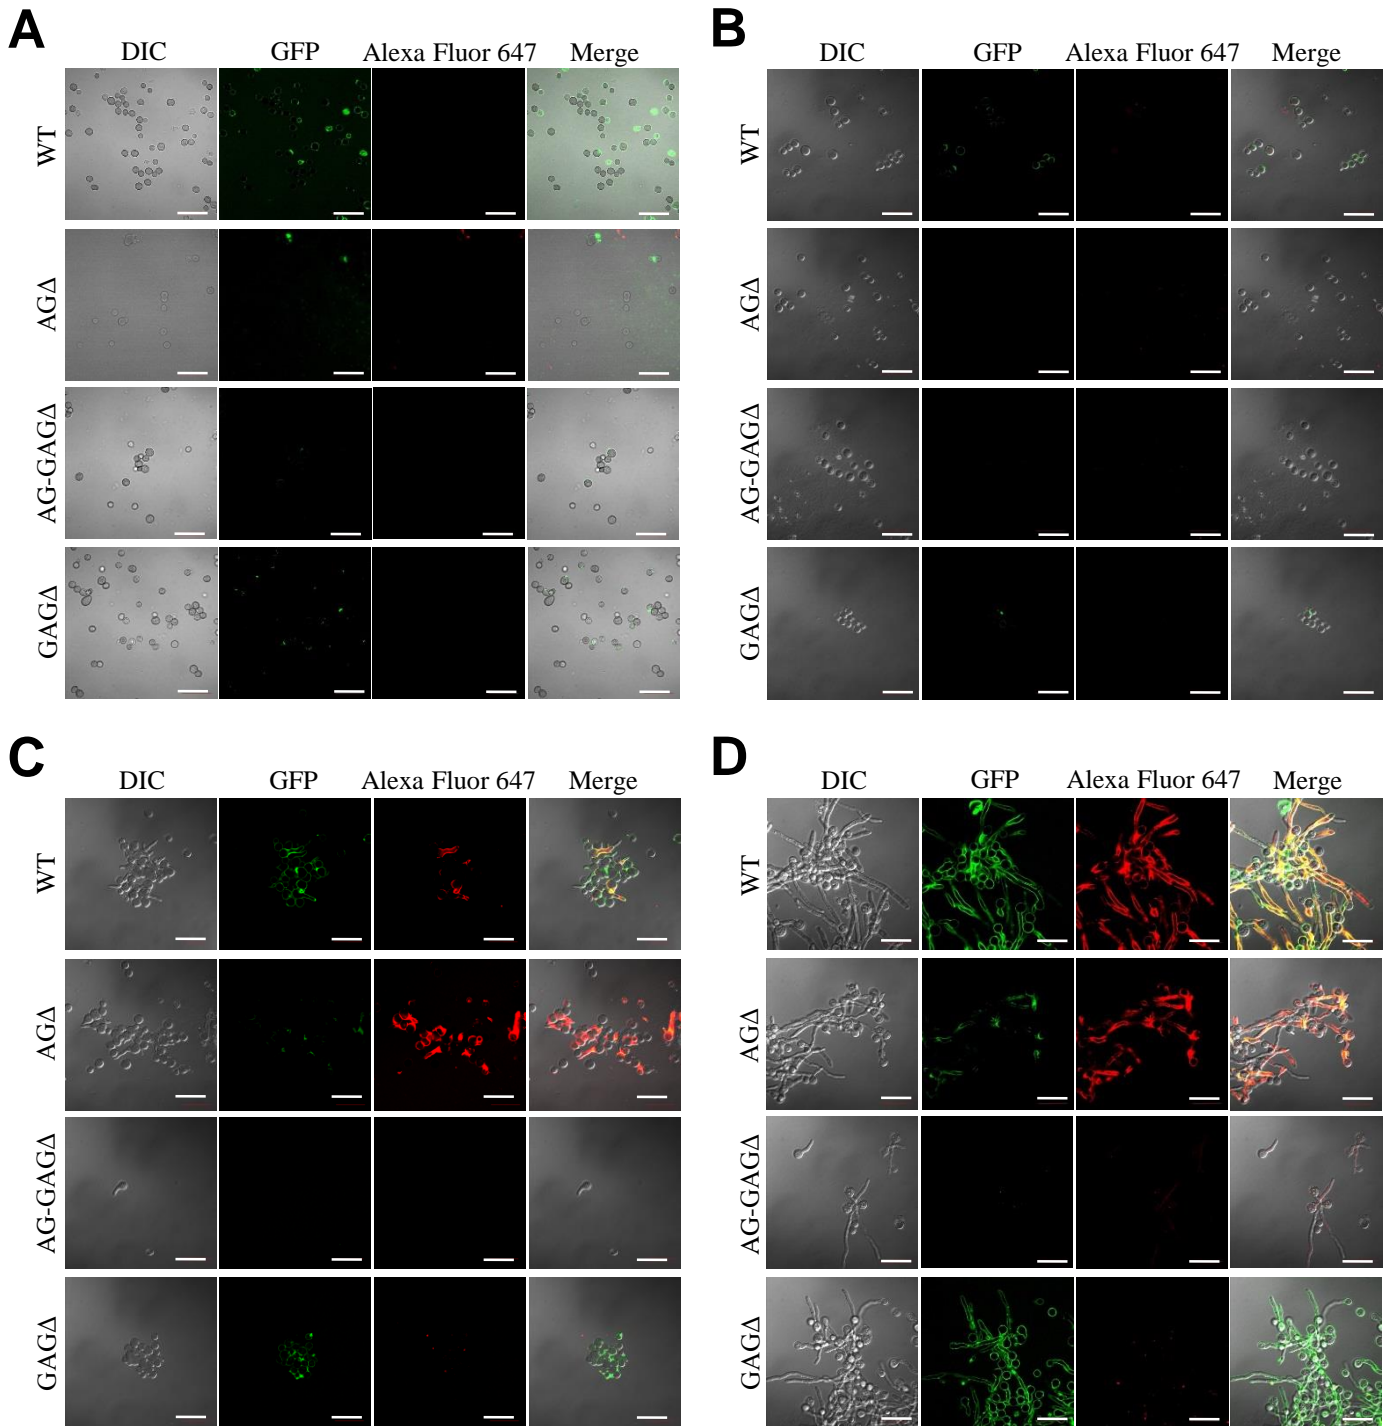

**FIG 6.** Visualization of AG and GAG in the cell wall by staining with AGBD-GFP and lectin (soybean agglutinin). Conidia ( $5.0 \times 10^5$ ) of the wild-type (WT),  $\Delta agsA\Delta agsB\Delta agsC$  (AG $\Delta$ ),  $\Delta agsA\Delta agsB\Delta agsC\Delta sphZ\Delta ugeZ$  (AG-GAG $\Delta$ ), and  $\Delta sphZ\Delta ugeZ$  (GAG $\Delta$ ) strains were inoculated into 500  $\mu\text{L}$  of CDE liquid medium and incubated at 30°C for (A) 0, (B) 3, (C) 6, and (D) 9 h with shaking (1200 rpm). At each time point, the cells were dropped on a glass slide, fixed with 4% (w/v) paraformaldehyde, stained with AGBD-GFP and soybean agglutinin–Alexa Fluor 647 conjugate (100  $\mu\text{g}/\text{mL}$  each), and observed under a confocal laser-scanning microscope ( $\times 1000$ ). Scale bars, 20  $\mu\text{m}$ .



A

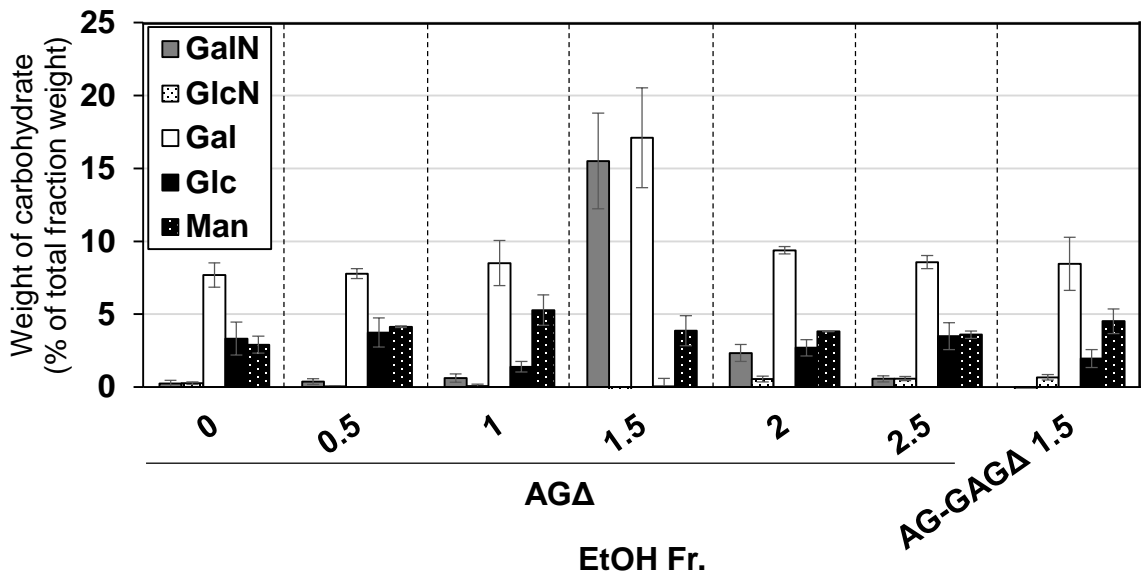

B

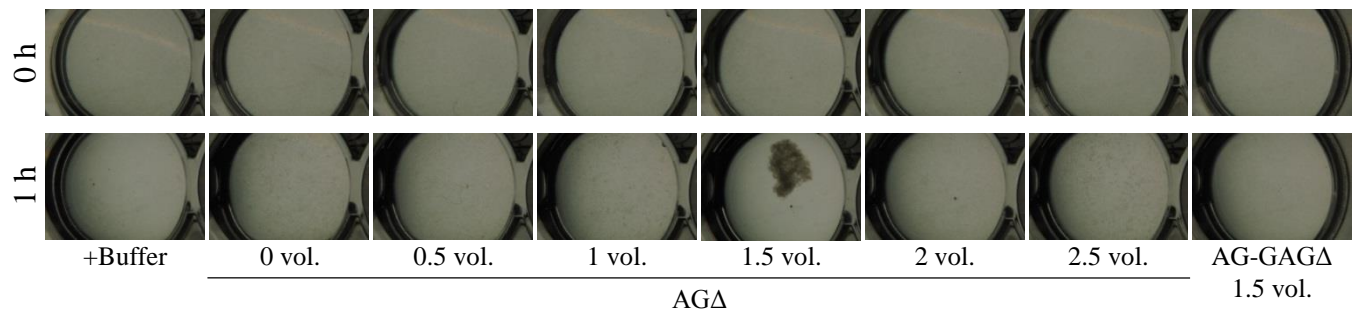

C

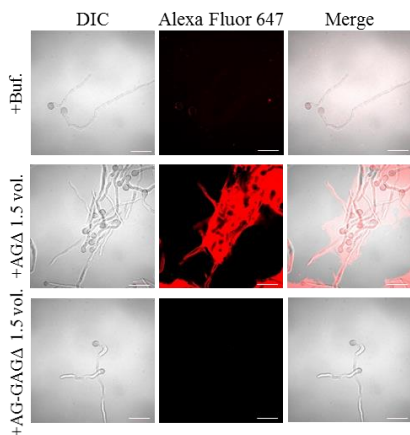

D

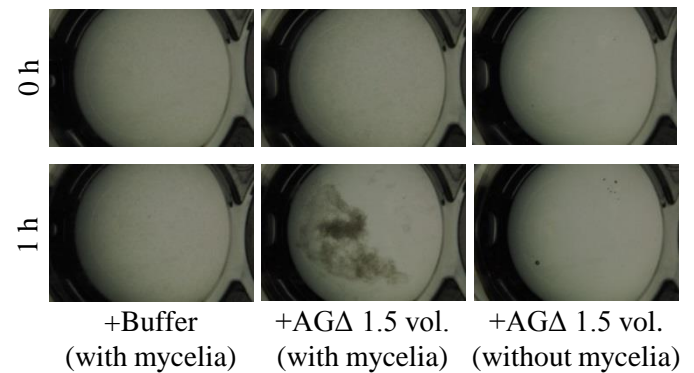

**FIG 7.** Aggregation of mycelia of the AG-GAG $\Delta$  strain induced by ethanol-precipitated GAG. (A) Composition of the fractions obtained by ethanol precipitation. (B) Mycelial suspension of the AG-GAG $\Delta$  strain (25  $\mu$ L) was added into a mixture of 400  $\mu$ L of water, 50  $\mu$ L of 1 M sodium phosphate buffer (pH 7.0), and 25  $\mu$ L of 2 mg/mL of the fractions prepared from the AG $\Delta$  or AG-GAG $\Delta$  strains, as indicated. Samples were incubated at 30 $^{\circ}$  C for 1 h with shaking and examined under a stereomicroscope (magnification,  $\times$ 8). (C) Mycelia incubated for 1 h in the presence of EtOH-precipitated GAG were stained with soybean agglutinin–Alexa Fluor 647 conjugates and observed under a confocal laser-scanning microscope ( $\times$ 1000). Scale bars, 20  $\mu$ m. (D) Aggregation assay with the 1.5 vol. fraction from AG $\Delta$  was performed as in (A), with or without mycelial suspension of AG-GAG $\Delta$ .



**A**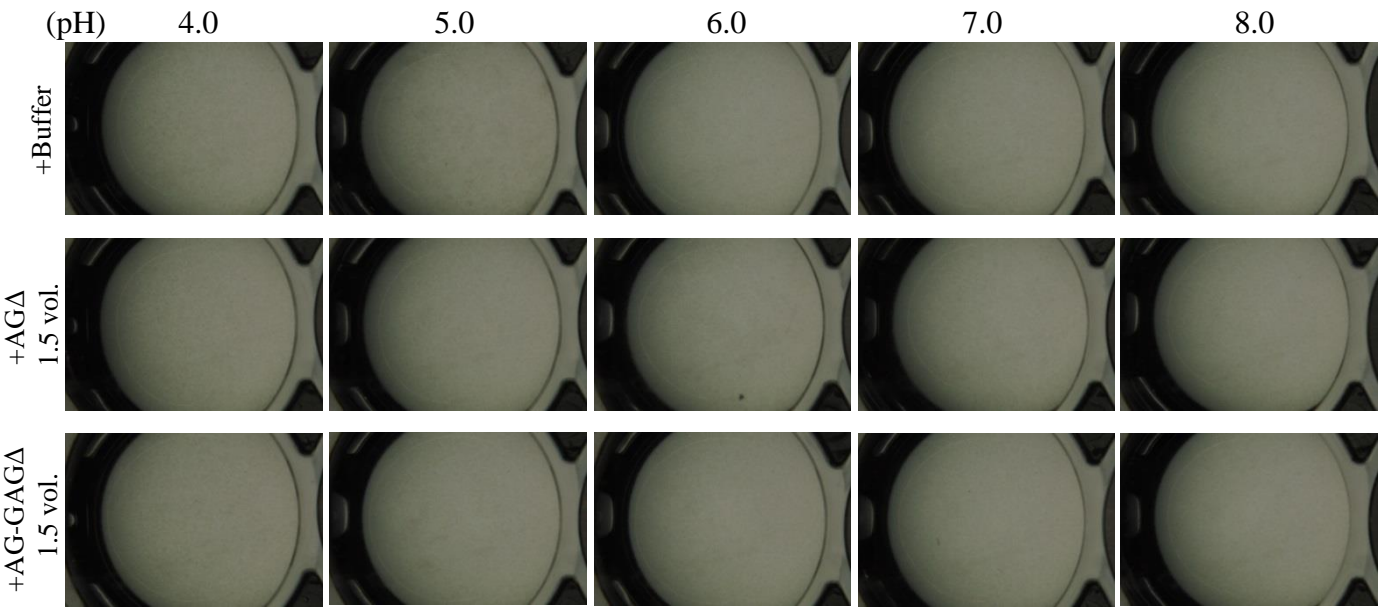**B**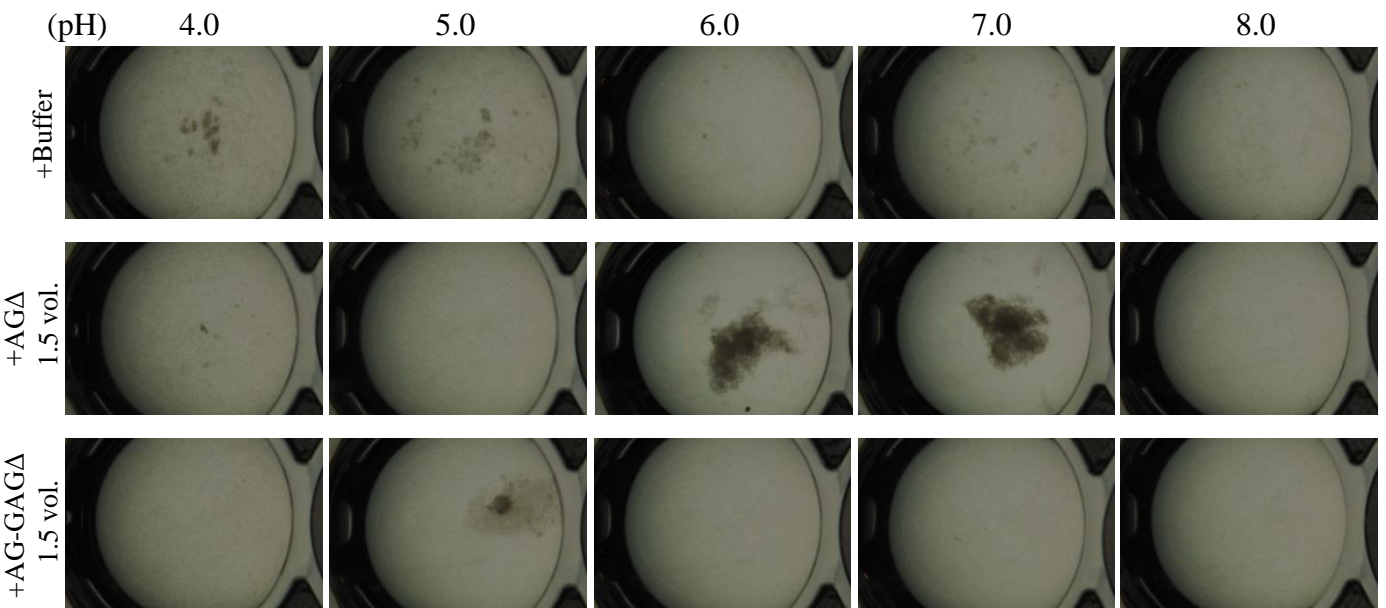

**FIG 8.** pH-dependence of GAG aggregation. Mycelial suspension of the AG-GAGΔ strain (25 μL) was added to 450 μL of buffers with different pH and 25 μL of the 1.5 vol. EtOH fraction prepared from the AGΔ or AG-GAGΔ strain as indicated. Samples were incubated at 30°C for (A) 0 h and (B) 1 h with shaking and examined under a stereomicroscope (magnification, ×8).

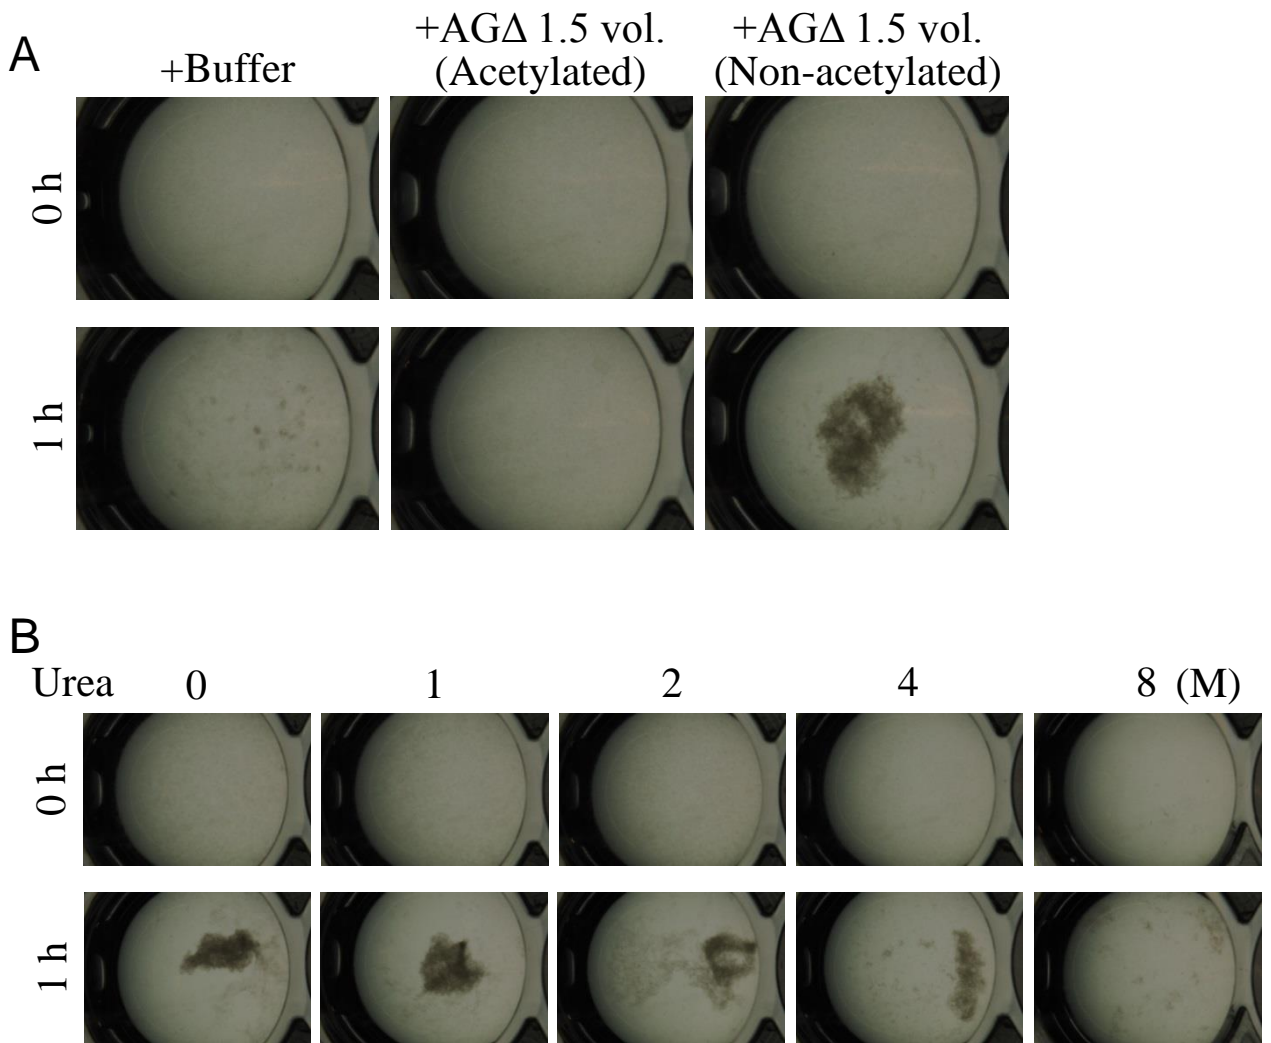

**FIG 9.** Mycelial aggregation in the presence of (A) acetylated GAG or (B) urea. (A) The amino groups of ethanol-precipitated GAG were acetylated with acetic anhydride. Mycelial suspension of the AG-GAG $\Delta$  strain (25  $\mu$ L) was added to a mixture of 450  $\mu$ L of 100 mM sodium phosphate buffer (pH 7.0) and 25  $\mu$ L of the 1.5 vol. EtOH fraction prepared from AG $\Delta$  (acetylated or not). (B) Mycelial suspension of the AG-GAG $\Delta$  strain (25  $\mu$ L) was added to a mixture of 450  $\mu$ L of 100 mM sodium phosphate buffer (pH 7.0) containing 0, 1, 2, 4, or 8 M urea, and 25  $\mu$ L of the 1.5 vol. EtOH fraction prepared from the AG $\Delta$  strain. Samples were incubated at 30 $^{\circ}$  C for 1 h with shaking and examined under a stereomicroscope (magnification,  $\times 8$ ).

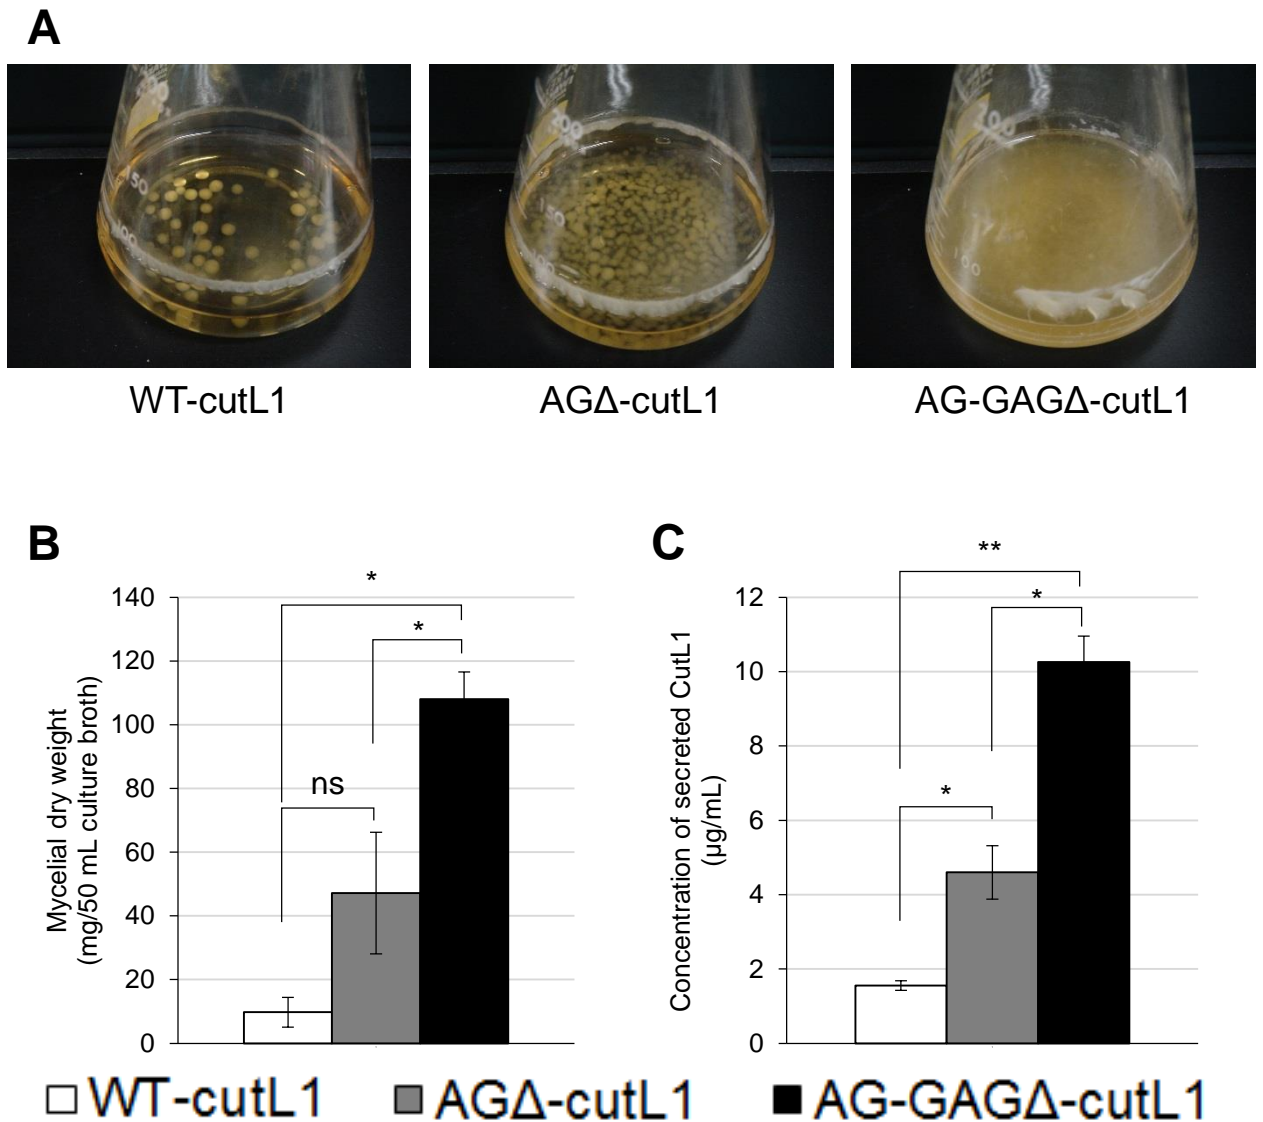

**FIG 10.** Recombinant CutL1 production by the WT-cutL1, AG $\Delta$ -cutL1, and AG-GAG $\Delta$ -cutL1 strains in liquid culture. (A) WT-cutL1, AG $\Delta$ -cutL1, and AG-GAG $\Delta$ -cutL1 strains. Conidia (final concentration,  $1 \times 10^4$ /mL) of each strain were inoculated into YPM medium and rotated at 100 rpm at 30°C for 24 h. (B) Mycelial dry weight of each strain. Mycelia grown for 24 h were collected by filtration through Miracloth, dried at 70°C and weighed. (C) Concentration of secreted CutL1 in culture supernatants. In (B) and (C), error bars represent the standard error of the mean calculated from three replicates (\* $p < 0.05$ ; \*\* $p < 0.01$ ). ns, not significant.
